# 1 Coding of interceptive saccades in parietal cortex 2 of macaque monkeys

3 Jan Churan<sup>1,2</sup>, Andre Kaminiarz<sup>1,2</sup>, Jakob C. B. Schwenk<sup>1,2</sup>, Frank Bremmer<sup>1,2</sup>

4 1) Dept. Neurophysics, Philipps-Universität Marburg, Marburg, Germany

5 2) Center for Mind, Brain and Behavior, Philipps-Universität Marburg and Justus-Liebig-Universität  
6 Gießen, Germany

7  
8 Corresponding author: Jan Churan, [jan.churan@staff.uni-marburg.de](mailto:jan.churan@staff.uni-marburg.de)

9  
10 Keywords: saccades, visual motion, parietal cortex, electrophysiology

11  
12 Declarations:

13 Funding: This work was supported by Deutsche Forschungsgemeinschaft (CRC/TRR-135/A1 [project number  
14 222641018], IRTG-1901, and RU 1847/A2) and by the Hessisches Ministerium für Wissenschaft und Kunst  
15 (HMWK; project 'The Adaptive Mind').

16 Conflicts of interest/Competing interests: The authors have no conflicts of interest to declare that  
17 are relevant to the content of this article.

18 Availability of data and code: The datasets generated during and/or analysed during the current  
19 study as well as the code used for evaluating the data are available from the corresponding author  
20 on reasonable request.

21 Ethics approval: All procedures had been approved by the regional authorities (TVA Nr.: V54-19 c 20 15 h  
22 01 MR 13/1 Nr. G71/2017) and were in accordance with the published guidelines on the use of animals in  
23 research (European Communities Council Directive 2010/63/EU).

## 24 Abstract

25 The oculomotor system can initiate remarkably accurate saccades towards moving targets (interceptive  
26 saccades) the processing of which is still under debate. The generation of these saccades requires the  
27 oculomotor centers to have information about the motion parameters of the target that then must be  
28 extrapolated to bridge the inherent processing delays. We investigated to what degree the information about  
29 motion of a saccade target is available in the lateral intra-parietal area (area LIP) of macaque monkeys for  
30 generation of accurate interceptive saccades. When a multi-layer neural network was trained based on  
31 neural discharges from area LIP around the time of saccades towards stationary targets it was also able to  
32 predict the end points of saccades directed towards moving targets. This prediction, however, lagged behind  
33 the actual post-saccadic position of the moving target by ~80 ms when the whole neuronal sample of 105  
34 neurons was used. We further found that single neurons differentially code for the motion of the target.  
35 Selecting neurons with the strongest representation of target motion reduced this lag to ~30 ms which  
36 represents the position of the moving target approximately at the onset of the interceptive saccade. We  
37 conclude that - similarly to recent findings from the Superior Colliculus (Goffart et al., 2017) – there is a  
38 continuum of contributions of individual LIP neurons to the accuracy of interceptive saccades. A contribution  
39 of other gaze control centers (like the cerebellum or the frontal eye field) that further increase the saccadic  
40 accuracy is, however, likely.

## 41 Introduction

42 Visual tracking of a moving object is achieved by combinations of saccades that bring the image of the object  
43 of interest onto the fovea and smooth pursuit eye movements that slowly follow a once foveated target.  
44 Saccades towards moving targets were shown to be remarkably accurate (Fuchs, 1967; Casanello et al., 2008;  
45 Fleuriet and Goffart, 2012). This performance of the saccadic system is striking since it must be able to  
46 extrapolate the motion trajectory of the target to account for its own processing time before saccade onset  
47 (typically 100 to 300 ms) as well as for the duration of the saccade (typically 20 to 50 ms) to accurately match  
48 the post-saccadic eye position with the position of the moving object. Which brain areas contribute to the  
49 processing and extrapolation of the target motion for purposes of interceptive saccades is still under  
50 discussion. It was previously shown that the activity of neurons in the superior colliculus (SC) does not  
51 account for the component of a saccade vector that is caused by the motion of a saccade target (Keller et al.,  
52 1996). The SC neurons in that study shifted their motion fields dependent on whether the saccades were  
53 made to stationary or moving targets in a manner that suggested that they only reflect the location of the  
54 appearance of a saccade target but not its subsequent motion. This finding gave rise to the so called ‘dual-  
55 drive’ hypothesis (Optican and Quiaia, 2002; Guan et al., 2005; Optican and Pretegianni, 2017) stating that the  
56 motion information is processed in parallel and is added to the motor command at a late stage of processing  
57 probably by the caudal fastigial nuclei of the cerebellum. This notion was later refined as Goffart et al. (2017)  
58 have shown that SC-neurons to a differential degree participate in generation of the motion related  
59 component of interceptive saccades. Beside these findings about the role of sub-cortical areas in processing  
60 of interceptive saccades, cortical contributions along the dorsal visual pathway are little investigated yet.  
61 Lesions in the middle temporal area (MT) of macaque monkeys, which is a major center in perception of  
62 visual motion, were shown to selectively reduce the accuracy of interceptive saccades while leaving saccades  
63 to stationary targets unimpaired (Newsome et al. 1985). Target motion related signals were also reported in  
64 the Frontal eye-field (Barborica and Ferrera, 2003; Xiao et al., 2007; Ferrera and Barborica, 2010) that  
65 receives input from the cortical motion areas (Tian and Lynch, 1996) and has direct efferent connections to  
66 the SC (Segraves and Goldberg, 1987; Stanton et al., 1988) and to the oculomotor areas in the brain stem  
67 (Schiller et al., 1980).

68 The lateral intraparietal area (LIP) is a major processing stage in the dorsal visual pathway as well as in the  
69 saccade generating circuit. Its connections make it well suited for processing of moving targets. It receives  
70 strong inputs from areas MT and the medial superior temporal area (MST, Blatt et al., 1990) that are almost  
71 exclusively engaged with processing of visual motion and sends efferent projections to the SC (Paré and  
72 Wurtz, 2001) and the frontal eye field (FEF, Schall et al., 1995) which are the major sources of saccadic motor  
73 commands. Results from an earlier investigation (Bremmer et al., 2016) have shown that LIP neurons carry  
74 information about the motion of a saccade target. The goal of the current study was to specify to what degree

75 information provided by LIP neurons can contribute to the accurate execution of interceptive saccades in 2D  
76 oculomotor space. To this end, we trained a multi-layer model to reproduce the trajectories of saccades to  
77 stationary targets from the perisaccadic activity of a sample of LIP neurons. Once this model was established,  
78 we used activities from the same neurons collected during interceptive saccades as inputs to the model and  
79 tested to what degree they account for the interceptive component of the saccade trajectory, that is, the  
80 deflection of the saccade end point in the direction of target motion.

# 81 Methods

## 82 Physiological preparation

83 Two adult male monkeys (*macaca mulatta*) participated in the study. In two separate surgeries each monkey  
84 was implanted with a head holder and a recording chamber. Based on MRI scans prior to surgery, the  
85 chamber (inner diameter 14 mm) was centered at a position 3 mm posterior from the interaural line and 15  
86 mm lateral from the longitudinal fissure (P3/L15) to access the region of the intraparietal sulcus (right  
87 hemisphere in both monkeys). During the experiments, the correct position of the electrode within the lateral  
88 intraparietal area (LIP) was determined based on properties of the neurons under study as well as properties  
89 of neurons in the neighboring cortical areas, predominantly the ventral intraparietal area VIP in the depth of  
90 the intraparietal sulcus, which was identified by directional selectivity for visual motion. The correct position  
91 of the recordings was later confirmed by histology in one of the monkeys (O). The other monkey (S) still  
92 participates in ongoing recordings. All procedures had been approved by the regional authorities and were  
93 in accordance with the published guidelines on the use of animals in research (European Communities  
94 Council Directive 2010/63/EU).

95 Single-unit recordings were done using standard tungsten microelectrodes (FHC, Bowdoin, USA) with an  
96 impedance of  $\sim 2$  M $\Omega$  at 1 kHz that were positioned by a hydraulic micromanipulator (MO-95, Narishige,  
97 Tokyo, Japan). A stainless-steel guiding tube was used for transdural penetration and support of the  
98 electrode. The neuronal signal was processed using a commercial system (Alpha Omega, Nof HaGalil, Israel).  
99 It was band-pass filtered (cut-off frequencies at 500 Hz and 8000 Hz) and sampled at 44 kHz.

## 100 Apparatus

101 During recordings, the monkeys were sitting head-fixed in a primate chair in a dark room, and their eye-  
102 position was monitored at 1000 Hz using a video-based eye tracker (EyeLink 1000, SR Research, Ottawa,  
103 Canada). The chair was positioned at a distance of 97 cm from a semi-transparent screen (size 160 cm x 90  
104 cm, subtending the central 79 deg x 50 deg of the visual field) on which the visual stimuli were back-projected  
105 using a PROPixx-projector (VPixx Technologies, St-Bruno de Montarville, Canada) running at a resolution of  
106 1920 x 1080 pixels and at a frame rate of 100 Hz.

## 107 Paradigms

108 The experimental paradigms were implemented using Matlab (R2012a, MathWorks, Natick, USA) and the  
109 psychophysics toolbox (Brainard, 1997; Pelli, 1997; Kleiner et al. 2007) on a standard Windows (v7, Microsoft,  
110 Redmond, USA) PC (Dell Precision T5810, Round Rock, USA). In all following experiments the saccade targets  
111 were always presented on a grey background (luminance 40 cd/m<sup>2</sup>). Before the main experiment started,

112 the saccadic tuning of the neuron under investigation was tested during visually guided saccades to stationary  
113 targets. In this pre-test, saccades with different directions (covering the full fronto-parallel angular space of  
114 360° in steps of 45°) and different amplitudes (typically between 7° and 20°) were used to find a saccade  
115 vector yielding strong peri-saccadic responses. This saccade-vector was then used during the main  
116 experiment, as the ‘preferred vector’ of the neuron. A saccade vector of the same amplitude but opposite  
117 direction (‘anti-preferred vector’) was also used in the main paradigm, although, the (usually very low) peri-  
118 saccadic activities from this saccade vector were only utilized to calculate the selectivity of the neuronal  
119 responses that was a criterion for a neuron’s inclusion into the main analysis.

120 In the main paradigm two types of trials were employed, the ‘stationary’ trials in which the monkeys made  
121 regular visually guided saccades towards stationary targets at different spatial positions and ‘interceptive’  
122 trials where they made saccades towards targets moving in one of eight directions (Figure 1). At the beginning  
123 of each trial the monkey fixated a target (small red square, side length 0.8°) placed at an eccentric position  
124 on the screen for a random duration (500 to 700 ms). This initial position of the target was chosen so that  
125 saccades towards the locations around the screen center yielded strong peri-saccadic responses (relative to  
126 the baseline activity) at least for a part of the investigated target locations. Then, in the ‘stationary’ trials  
127 (Figure 1, upper panel) the fixation spot stepped to one of 17 predefined positions placed around the center  
128 of the screen and the monkey’s task was to make a visually guided saccade to that position. The positions of  
129 the target were chosen in the center of the screen (0°/0°) and along the cardinal as well as the oblique axes  
130 in distances of 2° and 4° from the screen center. These specific positions were chosen to be identical with  
131 the positions of the moving targets in the interceptive trials after 200 ms and after 400 ms of motion and  
132 hence to be close to the average landing points of the interceptive saccades. The saccade had to be initiated  
133 within 300 ms from the stimulus step and land within an 8° x 8° window around the target. After the saccade,  
134 the monkey had to fixate the target for another 500 ms to obtain a liquid reward. Typically 10 trials were  
135 collected for each of the 17 different target positions. ‘Interceptive’ trials (Figure 1, lower panel) started with  
136 fixation of a stationary target at the same eccentric position as in the ‘stationary trials’. The monkey then  
137 made a saccade towards a target that first jumped to the center of the screen and then immediately started  
138 moving into one of 8 directions at a speed of 10°/s. Again, the saccade had to occur within 300 ms after the  
139 step of the target and had to land within an 8°x8° window around the current target position. After the  
140 saccade the monkey had to follow the target using smooth pursuit eye movements (SPEM) for another 800  
141 ms to receive a liquid reward. Typically, 15 trials were collected for each direction of stimulus motion. Both,  
142 the stationary and the interceptive trials were presented randomly interleaved during a single measurement.  
143 In the following we will name the saccades to the stationary targets ‘regular saccades’ and those to moving  
144 targets ‘interceptive saccades’.

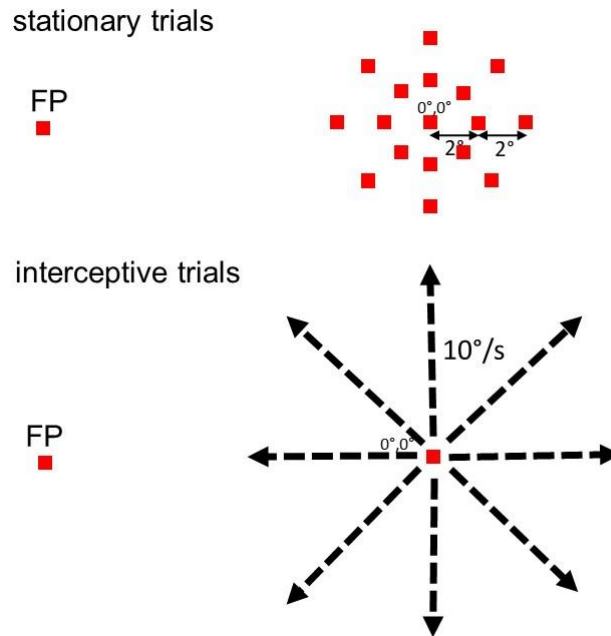

145

146 Figure 1: Sketches of the two types of trials that were used in the main paradigm. In the 'stationary' trials  
147 (upper panel) the monkey had to make a visually guided saccade from an eccentric fixation point (FP) to one  
148 of 17 target positions that were presented around the center of the screen. The possible positions of the  
149 target are depicted on the right side of the upper panel. They included the center of the screen and positions  
150 that were  $2^\circ$  and  $4^\circ$  away from the center in the four cardinal and four oblique directions. These chosen  
151 positions represent locations at which the moving target in the 'interceptive' trials arrives after 200 ms and  
152 400 ms of motion. In the 'interceptive' trials (lower panel) the monkey made a saccade from an eccentric  
153 position (which was the same as in the stationary trials) to a target that first stepped to the center of the  
154 screen and then immediately moved in one of eight directions at a constant speed of  $10^\circ/s$ .

## 155 Data processing and analysis

### 156 Processing of eye movements

157 The eye position signal was smoothed by a moving average filter with a span of 15 ms. Then the initial  
158 saccades were detected using a double velocity criterion in which at first time-windows were detected at  
159 which the eye-velocity exceeded  $100^\circ/s$  and then in a second step the beginning and the end of a saccade  
160 were identified when the velocity before and after these time windows first fell below  $30^\circ/s$ . The pre-saccadic  
161 and the post-saccadic eye positions were calculated as averages in a time window 6 - 16 ms before the start  
162 and 2 - 4 ms after the end of the saccade. The very short post-saccadic time window was chosen to avoid a  
163 contamination by the subsequent SPEM in the interceptive trials. The results were confirmed visually for a  
164 subset of the trials to give accurate estimates of pre- and post-saccadic eye positions.

### 165 Processing of neuronal data

166 Single units were isolated using a semi-manual spike sorter (Plexon Inc, Dallas, Texas). To this end we used a  
167 threshold on the electrode signal that was set manually to separate the action potentials from noise. The  
168 samples that exceeded the threshold were further analyzed using principal components as well as other  
169 features that were derived from the signal (like local maxima and minima). Then clusters of samples with

170 similar properties were identified visually and grouped together as a single unit. For a detailed description of  
171 the sorting process see the offline User Guide (Plexon, 2020). The procedures used for further analysis of the  
172 data were written in MATLAB (R2012a, MathWorks, Natick, USA),

### 173 *Generation of a pseudo-population*

174 The data basis for this investigation consists of the activity of a sample of 105 neurons (50 for monkey S, 55  
175 for monkey O) that were tested using both paradigms as described above. All neurons have shown a  
176 significant difference in activity ( $p < 0.01$ , t-test) between the preferred and the anti-preferred saccade  
177 direction in a time window between 100 ms before and 100 ms after the saccade onset.

178 Separate datasets were required for training and validation of the neural network model. Thus the data from  
179 the stationary trials was divided into a training sample that consisted of 70% of the trials and a validation  
180 sample that consisted of the remaining 30%. The processing steps described below were performed  
181 separately for the training and the validation trials. To minimize random effects caused by splitting of the  
182 datasets, we performed this procedure 50 times resulting in 50 training datasets and corresponding 50  
183 validation datasets.

184 It is important to note that different neurons within the sample were recorded during separate sessions and  
185 the preferred saccade directions and amplitudes could differ between the measurements dependent on the  
186 properties of the investigated neuron. Consequently, the recorded samples cannot be used to decode the  
187 full vector of the saccades but only their end-positions which were always similar between the recordings.  
188 To combine the activities of all neurons to create the model we first had to align their activity profiles to the  
189 same spatial and temporal coordinates. The procedure is illustrated in Figure 2a, b. We first calculated  
190 continuous peri-saccadic response functions for each target position in the stationary paradigm by convolving  
191 the spike times (relative to the saccade onset) with a Gaussian ( $\sigma = 20$  ms), and averaging over all collected  
192 trials. Then, we interpolated the neuronal activities for x/y-positions in-between the measured saccade end  
193 positions using linear interpolation. When an extrapolation of the activities was necessary to obtain a tuning  
194 over the same spatial area for each neuron, we chose the next-neighbor extrapolation method to not  
195 overestimate the activity outside of the investigated area. The resulting data matrix for each neuron sampled  
196 the area around the center of the screen from  $-4^\circ$  to  $+4^\circ$  in  $0.1^\circ$  steps for the horizontal and the vertical  
197 dimensions and the peri-saccadic times from 400 ms before the saccade onset to 350 ms after saccade onset  
198 in steps of 10 ms.

199 The same procedure was used for estimating the spatio-temporal activity profiles during the interceptive  
200 trials, using 8 saccade end positions that resulted from the different directions of target motion. Thus, the  
201 spatial area in which the interceptive saccades were investigated was smaller than for regular saccades since  
202 the saccade end-points were deflected by the stimulus motion on average only by  $\sim 1.5^\circ$  (see Figure 3) so the  
203 relevant area was only  $\sim 1.5^\circ$  in each direction around the center of the screen.



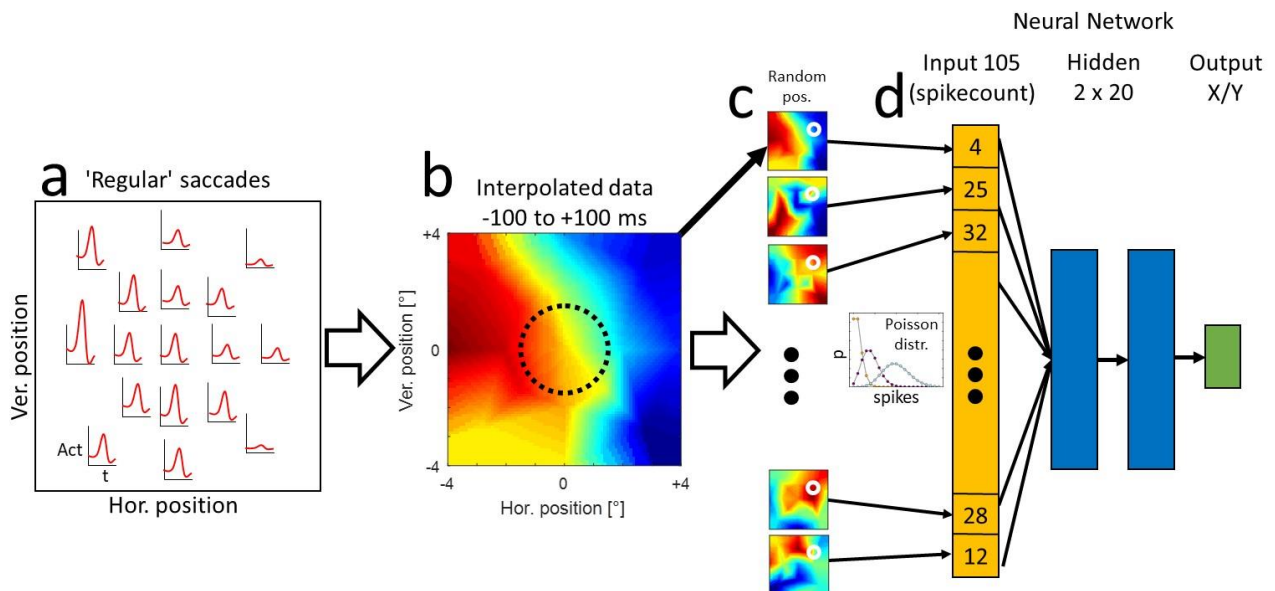

204

205 Figure 2: Processing steps towards a model predicting the end-position of regular saccades from activity of  
 206 the sample of 105 neurons. a: For one example neuron the peri-saccadic activity was sampled from 17  
 207 positions around the center of the screen. b: The activities were then interpolated over space and time in the  
 208 range of  $\pm 4^\circ$  in horizontal and vertical directions. The average activity in a time window of  $\pm 100$  ms  
 209 around the saccade onset was used for the training of the neural networks. The dotted circle represents a smaller  
 210 area in which the interceptive saccades and regular saccades were later compared. c: For each training  
 211 dataset a random spatial position was chosen and the activity of each of the investigated neurons at that  
 212 position (white circles) was used as a mean of a Poisson distribution from which the number of spikes in each  
 213 trial was randomly drawn. d: The randomly generated trials were used to train the neural network model  
 214 consisting of 105 elements in the input layer and 2 hidden layers with 20 elements each to predict the  
 215 horizontal and vertical coordinate of the landing position of the saccade.

### 216 *Training and validation of the neural network models*

217 For large part of the investigation we used a rather broad time-window between 100 ms before and 100 ms  
 218 after the onset of the saccade - the times at which most of the saccade-related activity takes place. To  
 219 investigate the time course of saccadic information we also used time-windows of 100 ms duration that were  
 220 shifted in steps of 50 ms in the range between 400 ms before and 350 ms after the saccade onset. For the  
 221 training of the networks a large training sample is advantageous to avoid overfitting of the data by the model.  
 222 Thus we generated a large set of trials based on the estimated spatio-temporal activity profile of each neuron  
 223 (Figure 2c) and the assumption that the spike counts in different trials are approximately Poisson distributed  
 224 (e.g. Shadlen and Newsome, 1998). To this end we chose a random saccade end-position between  $-4^\circ$  and  
 225  $+4^\circ$  in horizontal and vertical directions (white circles in Figure 2c) and calculated the mean expected spike-  
 226 count within the investigated time window for each neuron, based on the training sample of the recorded  
 227 trials. Then we used this average spike-count as the estimate for the mean of a Poisson distribution from  
 228 which the actual trial was randomly drawn. This procedure was repeated 100.000 times to sample well the  
 229 whole investigated spatial area.

230 For a validation of the model we either generated a similar dataset based on the validation trials or, for better  
231 clarity of presentation, we investigated the model predictions at discrete saccade end locations. To allow for  
232 comparison between the predictions of the model for regular and interceptive saccades, we have chosen  
233 these discrete locations as the average end-positions of interceptive saccades for different directions of  
234 target motion (Figure 3). In this way the model was tested only at those spatial positions where sufficient  
235 data was obtained for regular as well as for interceptive saccades.

236 For the decoding of the saccade end points from the activities in our neuronal sample we chose a shallow  
237 neural network model as implemented in the MATLAB Neural Network toolbox (R2018a). In our model the  
238 size of the input layer was determined by the size of the neuronal sample (105) and the size of the output  
239 layer by the content of the desired output (x-position and y-position, 2 elements). For the hidden layers we  
240 have tested several configurations which did not show large differences regarding the accuracy of the  
241 predictions and chose two hidden layers with twenty elements each (Figure 2d), which have shown a good  
242 accuracy as well as a relatively fast training speed. The networks were trained using the Levenberg-  
243 Marquardt algorithm (Levenberg, 1944; Marquardt, 1963). A separate network was trained for each of the  
244 50 splits between the training and the validation samples and for each investigated time window. After the  
245 training, the performance of the networks to predict 1) saccade end-positions of regular saccades and 2)  
246 saccade end-positions of interceptive saccades was tested. As mentioned above, for regular saccades the  
247 separately generated validation samples were used for this testing. In contrast, for the study of interceptive  
248 saccades no splitting of the data was necessary since the trials from interceptive saccades were always  
249 independent from the training trials and thus here the full data sample was used.

## 250 Results

### 251 Interceptive saccades

252 During the single unit recordings we collected the data from altogether 11631 interceptive saccades. For a  
253 brief overview - the average amplitude of these saccades was  $9.7^\circ$  (std  $3.9^\circ$ ), the average latency was 134 ms  
254 (std 44 ms) and the mean duration (time between the onset of the saccade and its end) was 36 ms (std 8.9  
255 ms). To confirm the expected effect of target motion on saccadic eye movements, we investigated the end-  
256 points of saccades towards targets moving from the center of the screen (coordinate  $0^\circ/0^\circ$ ) in eight different  
257 directions. We fitted 2D Gaussians to the saccade end-positions separately for each motion direction as  
258 shown in Figure 3. The results demonstrate that the motion of the stimulus exhibited a clear influence on the  
259 end-positions of the interceptive saccades. They were, on average, shifted in the direction of the target  
260 motion, however, there was a major spread of the end-positions as can be seen by the example data-points  
261 (cyan) that are provided for one motion direction. Another hallmark of interceptive saccades is the  
262 dependence of their trajectory on their timing (Quinet and Goffart, 2015; Bremmer et al., 2016), in that the  
263 target-motion dependent component becomes larger at longer saccade latencies. This dependence is  
264 confirmed in Figure 4b that shows the relationship between the time of the saccade end and the motion-  
265 related component of the saccade. For that purpose the saccade end position is expressed as the 'Intercept'  
266 – which is the orthogonal projection of the saccade end-position on the vector of the target-motion (Figure  
267 4a) and was calculated as:

$$268 \text{ intercept} = x \cdot \cos(\alpha) + y \cdot \sin(\alpha) \quad (1)$$

269 Where  $x$  and  $y$  are the coordinates of the saccade end position and  $\alpha$  is the angle representing the direction  
270 of target motion.

271 Although the landing positions in single trials have shown some variability (std of regression residuals =  $0.82^\circ$ ),  
272 they show a clear correlation between the time of saccade end and the intercept (Pearson correlation:  
273  $r=0.39$ ,  $p<0.001$ ). The regression line fitted to the data (black line) resembled the target position at the end  
274 of the saccade (grey line) which is also supported by the resulting equation of the regression in which the  
275 slope was  $9.6^\circ/s$  (target speed was  $10^\circ/s$ ) and the crossing of the  $y$ -axis was at  $-0.17^\circ$ . All target directions  
276 were collapsed for this analysis, results for individual directions are shown in Figure S-1.

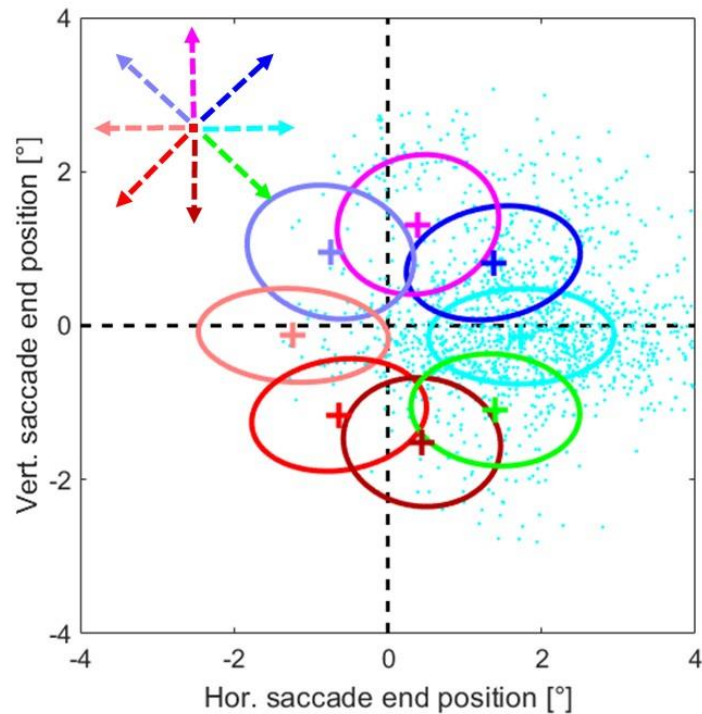

277

278 Figure 3: Two dimensional Gaussians fitted to the end-positions of interceptive saccades. Different colors  
 279 represent different target directions, crosses show the mean saccade end position and the borders of the  
 280 ellipses represent one standard deviation around the mean. Raw data depicting the end points of the  
 281 saccades (cyan dots) are only shown for target movement to the right (0°).

282

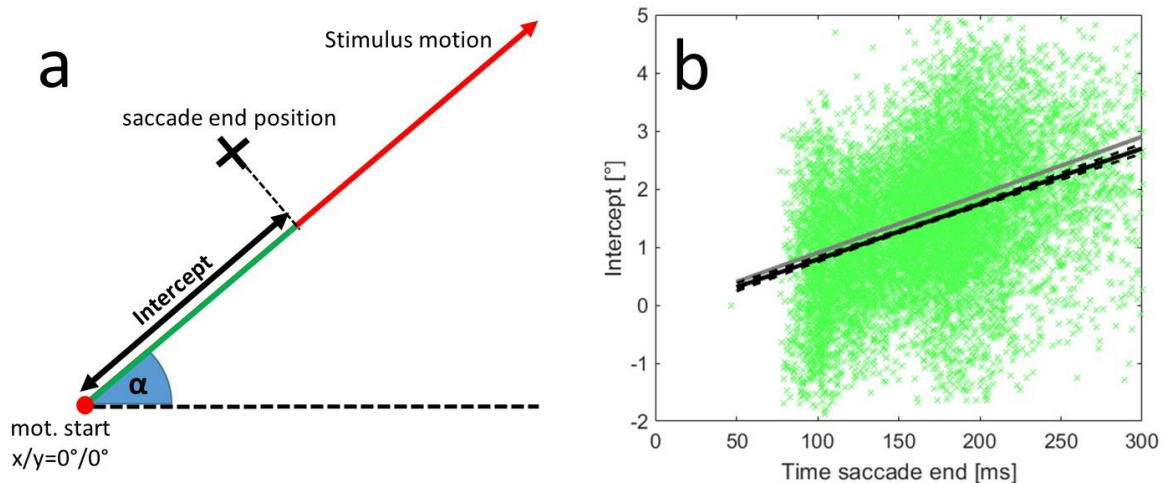

283

284 Figure 4: a: Description of the 'Intercept' as the component of saccade end-position that was aligned with  
 285 the motion vector of the target. b: Relationship between the timing of the end of the interceptive saccades  
 286 and their intercepts. The data from 11.631 interceptive saccades are shown as green crosses, the correlation  
 287 between the time of saccade end and the intercept was 0.39 ( $p < 0.001$ ). The grey line marks the position of  
 288 the target (relative to the center of the screen) at the respective time. The black line shows the results of a  
 289 linear regression of the data and the black dashed lines its confidence interval ( $p = 0.01$ , as calculated from a  
 290 bootstrapping procedure). The motion directions of the targets were collapsed for this analysis, results for  
 291 individual directions are shown in Figure S-1.

## 292 Single-unit responses

293 As described in the methods section, we interpolated the activities of single neurons recorded during  
294 saccades towards stationary targets as well as during interceptive saccades between different spatial  
295 positions and different times relative to the saccade onset. We focused on the area of 4x4 degrees around  
296 the center of the screen since this is the area where most of the interceptive saccades landed. The time  
297 course of the perisaccadic-activity in area LIP was in detail described elsewhere (e.g. Barash et al., 1991).  
298 Thus here we only show the temporal profiles at different spatial positions for one example neuron. The  
299 profiles show two typical features that were found in most of the neurons in the investigated sample. Firstly,  
300 the neurons reached their maximal activity around the time of saccade onset and, secondly, they show some  
301 degree of saccade-related activation at all investigated spatial locations, however, the amount of activation  
302 varied between locations.

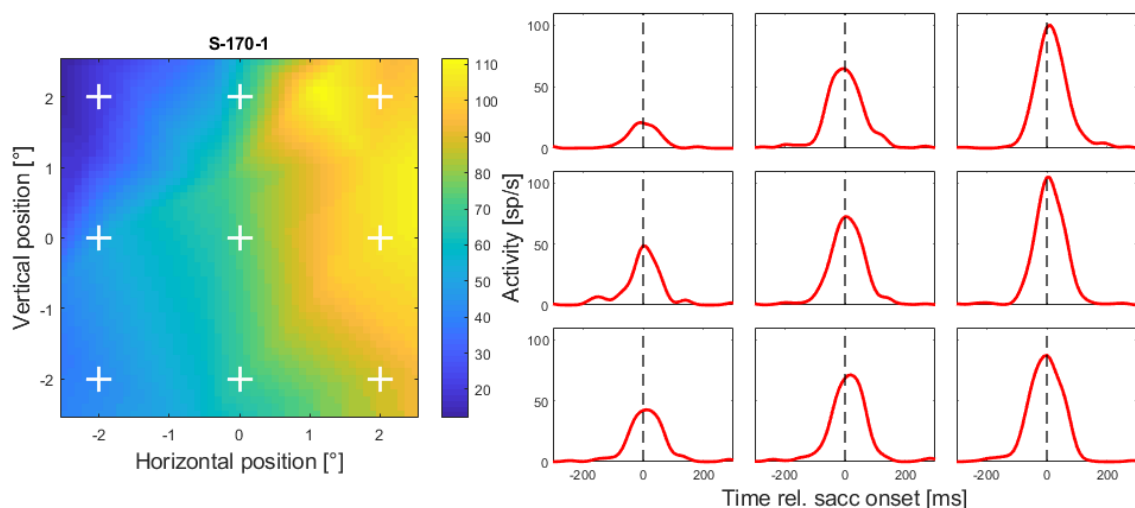

303

304 Figure 5: Time course of the interpolated peri-saccadic activity from one example neuron taken at nine  
305 example positions around the center of the screen. Note, that these position were chosen to give an overview  
306 over the investigated spatial area and do not coincide with the locations of the saccade targets used in the  
307 experiment. The left plot shows the spatial activity profile of the neuron at saccade onset (calculated using  
308 the spatial and temporal interpolations as described in the Methods), the white crosses marking the positions  
309 from which the temporal profile is shown in the plots on the right. The arrangement of plots on the right  
310 corresponds to the arrangement of the crosses in the left plot.

311 Next, we compared the activity profiles obtained from the regular and the interceptive saccades. The activity  
312 maps at the time of the saccade onset from four example neurons are shown in Figure 6 (more examples  
313 from another four neurons are shown in Figure S-2). From a visual inspection, activity profiles from two  
314 neurons shown in the left two columns appear to show a good resemblance for regular and interceptive  
315 saccades while profiles from two other neurons shown in the right columns show no such resemblance. We  
316 used two quantitative measures to calculate the degree of similarity between the profiles. A Pearson

317 correlation between the profiles which was 0.75 and 0.87 for the neurons in the left columns and 0.12 and -  
 318 0.17 for the neurons in the right columns. We also calculated a similarity index (Sotero et al. 2010) as:

$$319 \quad SI = 1 - \frac{\|z(R) - z(I)\|_F}{\|z(R)\|_F + \|z(I)\|_F} \quad (2)$$

320 where  $\|X\|_F$  is the Frobenius norm of  $X$ ,  $z(R)$  is the  $z$ -transformed activity profile for regular saccades and  $z(I)$   
 321 is the  $z$ -transformed activity profile for interceptive saccades. The value of  $SI$  is always between 0 and 1,  
 322 where 1 would be only achieved when  $R$  and  $I$  were identical. In the examples in Figure 6 the  $SI$ s of the  
 323 neurons in the left column were 0.43 and 0.70 and in the right column 0.12 and 0.16. For more robust results  
 324 we next averaged the activity in the time window between 100 ms before and 100 ms after the saccade onset  
 325 and used these maps to compare the activity profiles for all neurons in our sample. The results are shown in  
 326 Figure 7. The correlations and the  $SI$ -values point towards a continuum in degrees of similarity between the  
 327 activity profiles for the two types of saccades. At least in a part of the sample of neurons saccade-related  
 328 tuning appears to be very similar, independent of whether the saccade end position was systematically  
 329 changed by different positions of stationary saccade targets or by interception of targets moving in different  
 330 directions.

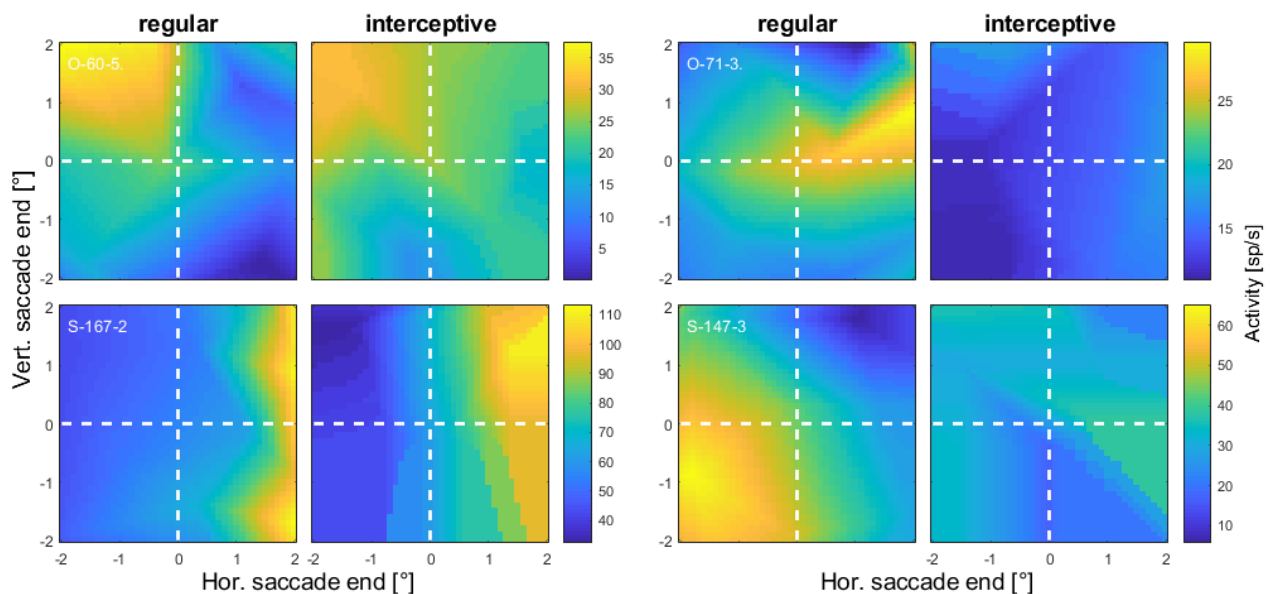

331

332 Figure 6: Spatial tuning profiles from four example neurons calculated from a Gaussian window ( $\sigma = 20$  ms)  
 333 centered on saccade onset for regular and interceptive saccades. The positions at the x and y axes represent  
 334 the locations of saccade endpoints relative to the center of the screen. The two examples in the left two  
 335 columns show an apparent similarity between the two activity profiles while for the neurons whose activity  
 336 is shown in the two columns on the right no such similarity was observed. Note that the color scales were  
 337 chosen rather to optimally compare the tuning profiles within single neurons than to make comparison  
 338 between the neurons. Data from another four example neurons are shown in Figure S-2.

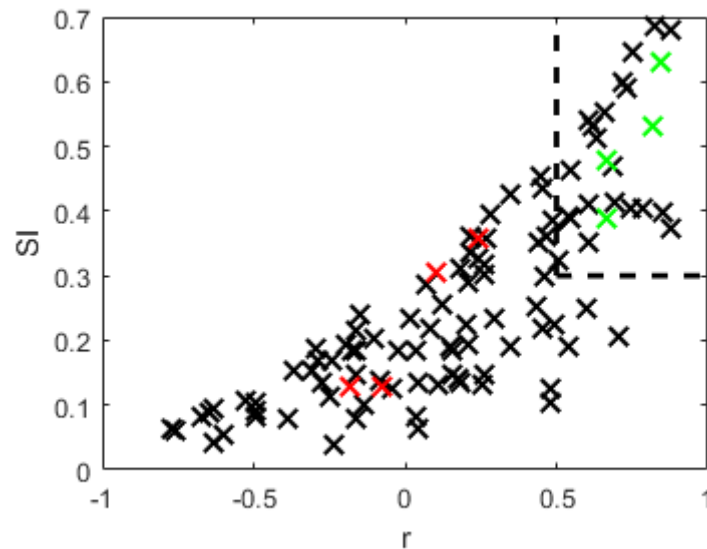

339

340 Figure 7: Measures of similarity between the activity profiles for saccades to stationary targets and  
341 interceptive saccades for a sample of 105 LIP neurons. The activity profiles were averaged in a time-window  
342 between 100 ms before and 100 ms after saccade onset. The Pearson correlation coefficients are plotted at  
343 the x-axis and the similarity coefficients (as defined in Eq. 1) on the y axis. The red and the green crosses mark  
344 the neurons that are shown as examples in Figures 6 and S-2. Dashed lines mark the area containing 25  
345 neurons that were used in a later analysis of neurons with highest similarity of profiles between regular and  
346 interceptive saccades.

## 347 Representation of regular and interceptive saccades in LIP population 348 activity

349 We trained neural network models to predict the landing points of saccades towards stationary targets from  
350 the activities of our sample of 105 LIP neurons. As described in the Methods, we split the data in 70% training  
351 and 30% validation trials 50 times to mitigate the effects of random differences between the splits. Figure S-  
352 3a shows an example of a validation test of one of the resulting 50 networks that was trained on activity in  
353 the time-window between -100 and +100 ms relative to the saccade onset. As stated above, we decided to  
354 test the performance of the model at locations that represented the average landing points of interceptive  
355 saccades because here sufficient data was collected for the regular as well as for the interceptive saccades  
356 and thus a fair comparison of the two was possible. Figure S-3a shows the model results for the validation  
357 trials from one of the networks for regular saccades. The black crosses represent the predicted saccade end  
358 points for 1000 single trials that were generated from data at positions marked by the red circles. Means and  
359 standard deviations in x and y directions are shown as green crosses. The averages of the estimates  
360 apparently fit the tested positions well in most cases. This is also supported by the confusion matrix on the  
361 right side of the plot in which the trials are assigned to one of the eight tested positions based on the minimal  
362 Euclidian distance. On average 47% of single trials were assigned correctly (12.5% are expected by chance)  
363 and on average 88% were assigned correctly or to one of the direct neighbors (37.5% are expected by  
364 chance). Some of the tested positions (e.g. position 3) show a systematic error of the predictions which likely

365 is a result of random effects of splitting the original data into training and validation samples. In Figure S-3b,  
366 the same neural network as in S-3a was tested using data from interceptive saccades. Also here the  
367 distributions of predicted saccade end positions deviate from the center towards the tested positions. This  
368 is also confirmed by the confusion matrix showing on average 36% of correct assignments and 75% of  
369 assignments that were either correct or one of the direct neighbors. In this case, however, a clear bias  
370 towards the center of the screen can be observed for all of the tested positions.

371 We combined the predictions for all 50 networks that were trained using the different data splits. The results  
372 are shown in Figure 8. Here the mean predicted positions from all tested networks are marked as a cross and  
373 the averaged standard deviations for all tested networks in x and y directions are shown as an ellipse. As in  
374 Figure S-3, we found that the predicted end positions of regular saccades (Figure 8a) were on average quite  
375 accurate with a mean error of  $0.38^\circ$  (for comparison - the typical accuracy of the EyeLink eye-tracker is  
376 reported to be  $0.25^\circ$  to  $0.5^\circ$ ). The confusion matrix showed on average 37% correct assignments and 81%  
377 correct or direct neighbor assignments. We also found that the neural networks were capable to predict  
378 saccade end positions of interceptive saccades (Figure 8b); here, the confusion matrix showed 34% of correct  
379 assignments and 74% correct or direct neighbor assignments. However, a systematic error towards the  
380 center was also observed for all tested positions. For an easier comparison between the two types of  
381 saccades we calculated the 'center bias' of the predictions as the difference between the intercept (Figure  
382 4a, eq. 1) of the tested position and the intercept of the prediction. A positive value indicates that the  
383 predicted saccade position is shifted towards the center relative to the tested position and vice versa. In  
384 Figure 8c, d the center bias is shown for the different tested positions and as averages over all positions. The  
385 center bias for interceptive saccades was on average  $0.75^\circ$  and significantly ( $p < 0.01$ , paired t-test) higher  
386 than for regular saccades (average  $0.25^\circ$ ).



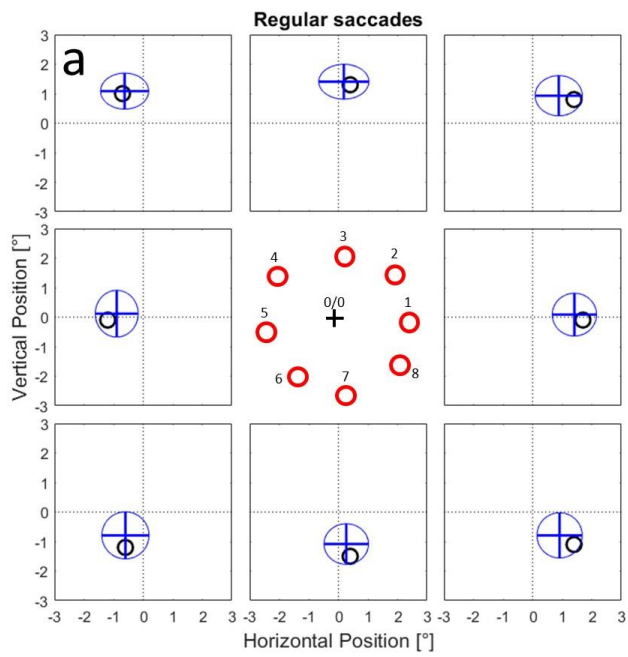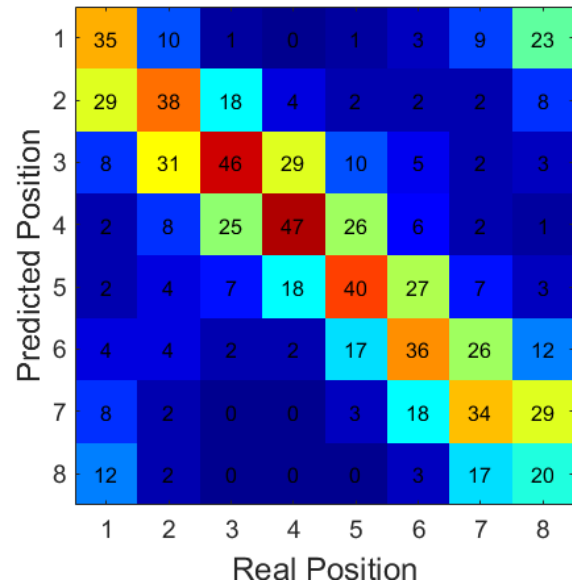

387

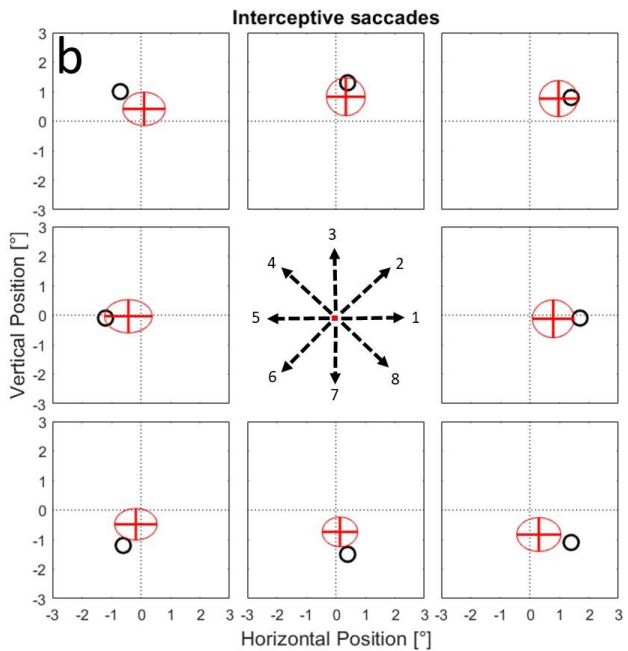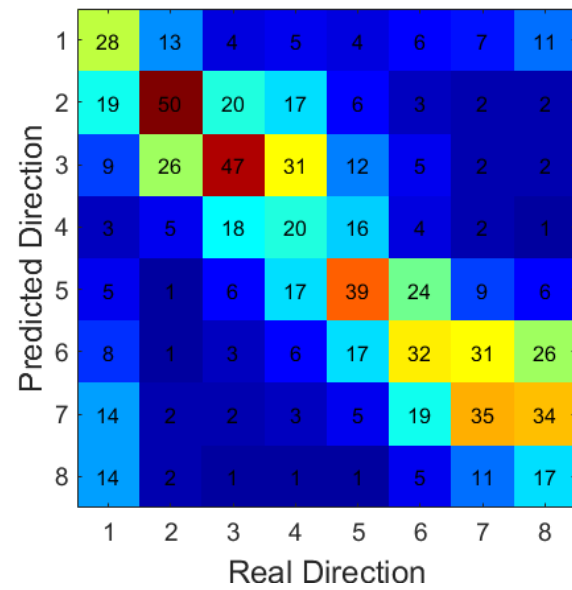

388

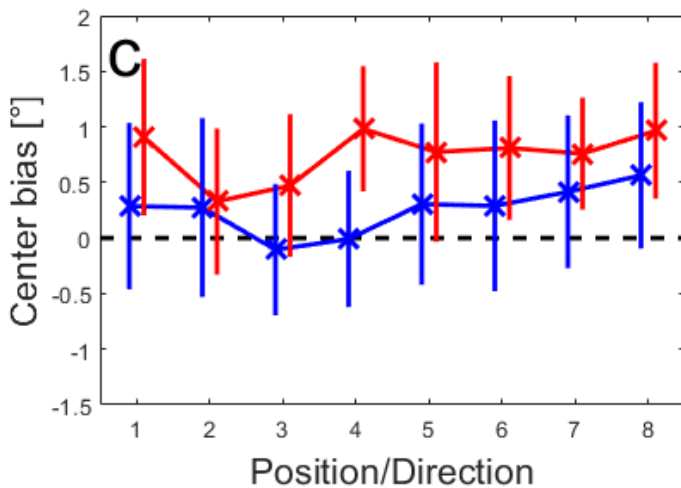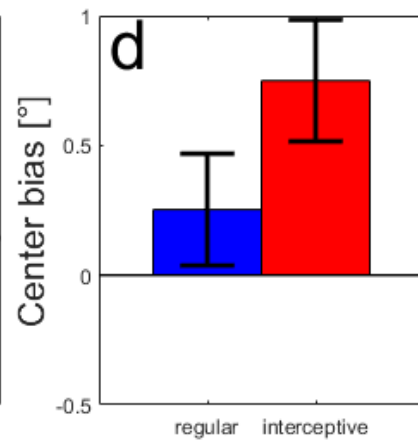

389

390 Figure 8 a: Validation of the training success for 50 networks that were trained on 70% of the available data  
391 from regular saccades and tested using the remaining 30%. Black circles show the tested positions, the  
392 ellipses represent the average positions and average standard deviations from 50 validation samples. In the  
393 confusion matrix on the right, the predictions from single trials over all validation samples were assigned to  
394 one of the tested positions based on the minimal Euclidian distance between the prediction and each of the  
395 tested positions. b: The same plot for predicting the end positions of interceptive saccades from the  
396 population activity based on neural network models trained using data from regular saccades. c: Averages  
397 and standard deviation of the Center bias for different tested positions for regular (blue line) and interceptive  
398 (red line) saccades. The lines are slightly shifted for better visibility. d: Averages and standard deviations of  
399 the center bias for regular (blue) and interceptive (red) saccades calculated over all tested positions.

400 We further investigated this systematic pattern of prediction errors by making the model networks predict  
401 saccade end-points in a continuous area in a range of  $1.5^\circ$  around the center of the screen (coordinate 0/0).  
402 Figure 9 (a, b) shows the error vectors between the tested position (arrow backs) and the prediction of the  
403 model (arrow tips) for regular (a) and interceptive (b) saccades. Note that in this figure, for a better overview,  
404 we have chosen to reduce the number of presented locations and reduced the length of the arrows  
405 (representing the size of the error) by 50%. The figures show that while there is no clear pattern of errors for  
406 the regular saccades, the predictions for the interceptive saccades are clearly biased towards the center. This  
407 center bias increases with increasing eccentricity of the tested positions. The details about the direction and  
408 the amplitude of the errors for all tested positions are then shown in Figure 9c-f for all tested positions. They  
409 confirm that while for the regular saccades only small (albeit systematic) errors were observed (c, e), for the  
410 errors for interceptive saccades a pinwheel structure of error directions (d) indicates a compression of the  
411 predictions towards the center of the screen. The strength of the error grows with increasing eccentricity  
412 with the exception of an area in the upper right quadrant in which the predictions were more accurate than  
413 in the rest of the tested positions (f).

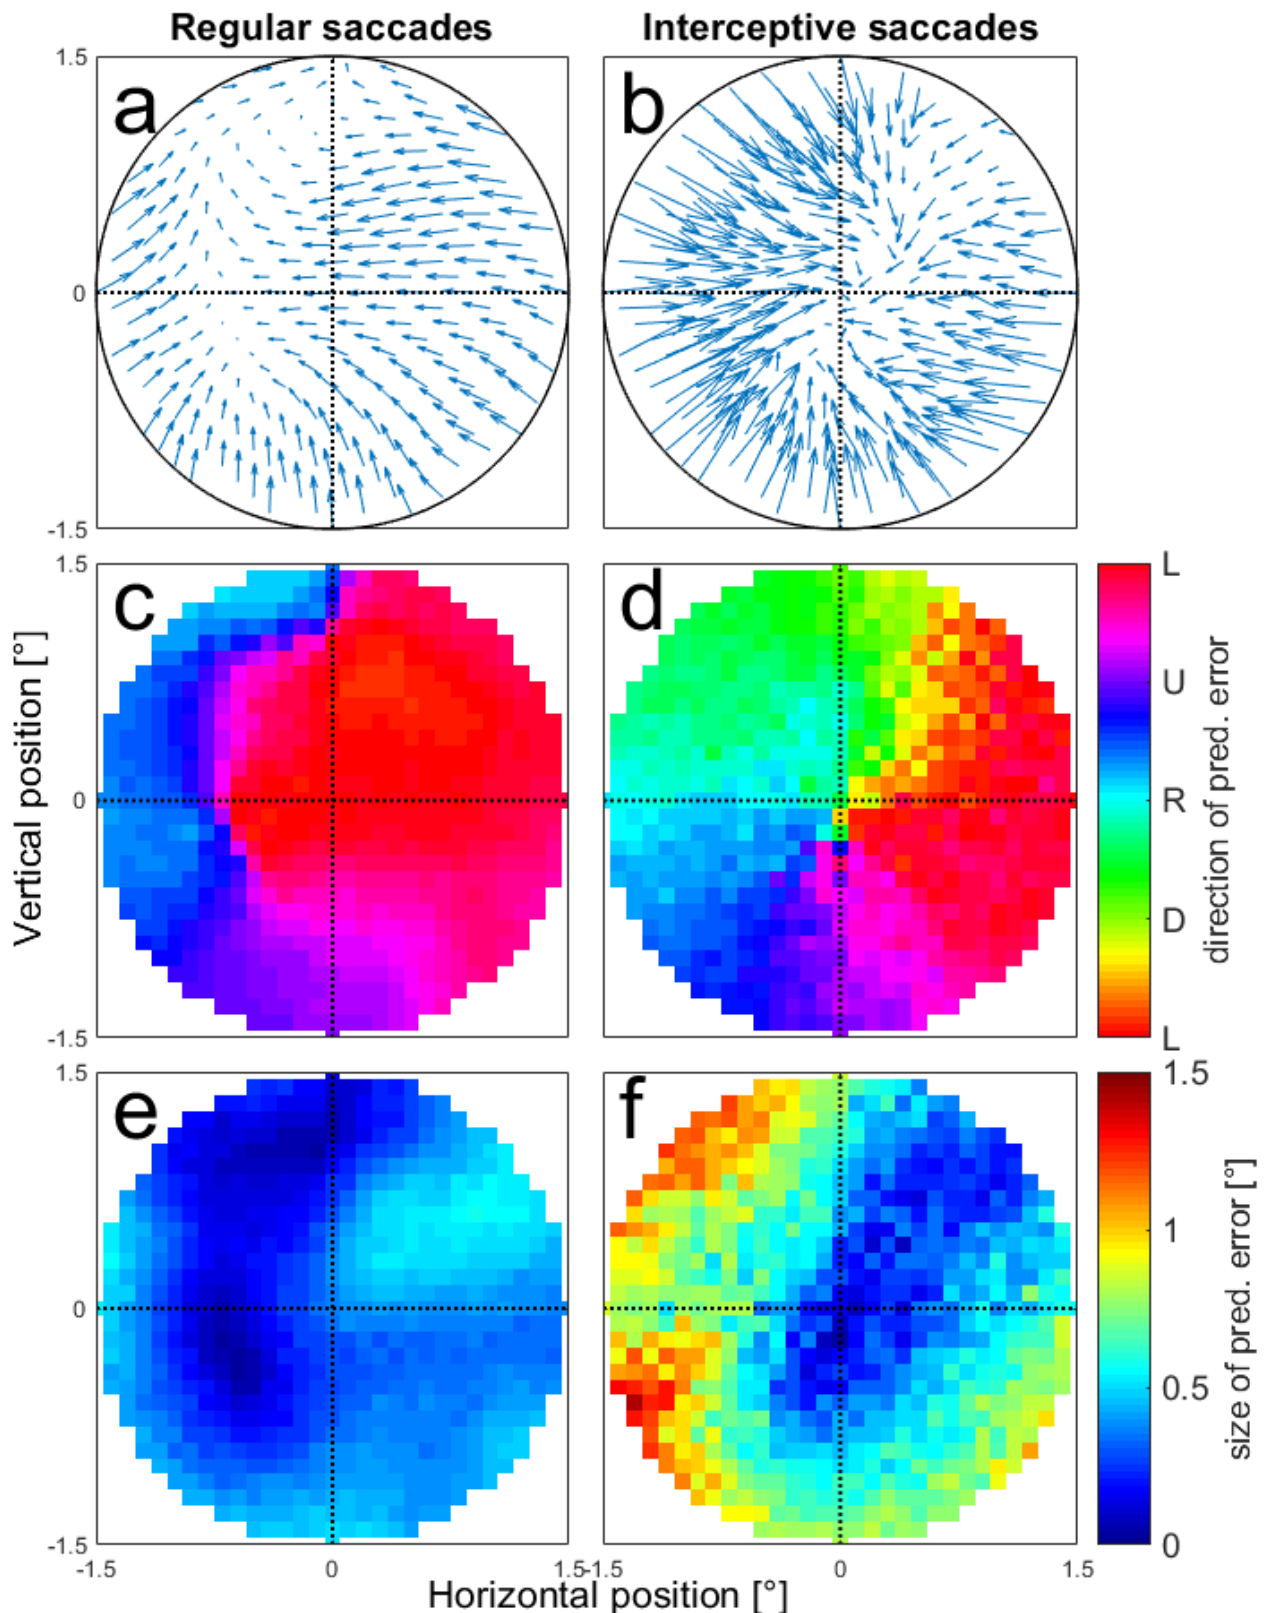

414

415 Figure 9: Prediction errors of saccade end positions tested at different positions in the area of 1.5° around  
416 the screen center. a, b: Average error vectors shown at selected positions. The arrows indicate the  
417 differences between the tested positions and the predictions of the model. The length of the error vectors is  
418 scaled down by 50% for a better overview. c, d: Average directions of the error vectors for regular (c) and  
419 interceptive (d) saccades. e, f: Average length of the error vectors for regular (e) and interceptive (f) saccades.

420 Results shown in Figure 7 indicate, that there is a continuum of similarities between the activity profiles  
421 between regular and interceptive saccades in the LIP neuronal population, ranging from very different to  
422 close to identical. Thus, we asked whether these similarities also reflect the ability of the neurons to code for  
423 the end position of interceptive saccades (and consequently represent the movement of the target). To test  
424 this, we focused on a sub-sample of neurons with the strongest similarity between the two activity profiles  
425 as obtained from the regular and interceptive saccades. For this sample of ‘best’ neurons we selected 25  
426 neurons in which the Pearson correlation between the spatial activity profiles for regular and interceptive  
427 saccades was larger than 0.5 and the Similarity index was larger than 0.3. These borders are marked by a  
428 dashed line in Figure 7. Using this sample of neurons, we again trained the neural networks for predicting  
429 the endpoints of interceptive saccades based on training data taken from regular saccades. The results are  
430 shown in Figure 10 in the same format as Figure 8. It indicates that while the predictions were on average  
431 accurate for regular saccades, the center bias that was previously observed for interceptive saccades was not  
432 fully eliminated albeit strongly diminished and was now on average only  $0.3^\circ$ . Given the target speed of  $10^\circ/\text{s}$   
433 this spatial bias can be transformed into a 30 ms time-lag on the target, which corresponds well with the  
434 position of the target at the beginning of the interceptive saccade (average duration of interceptive saccades  
435 was 36 ms).

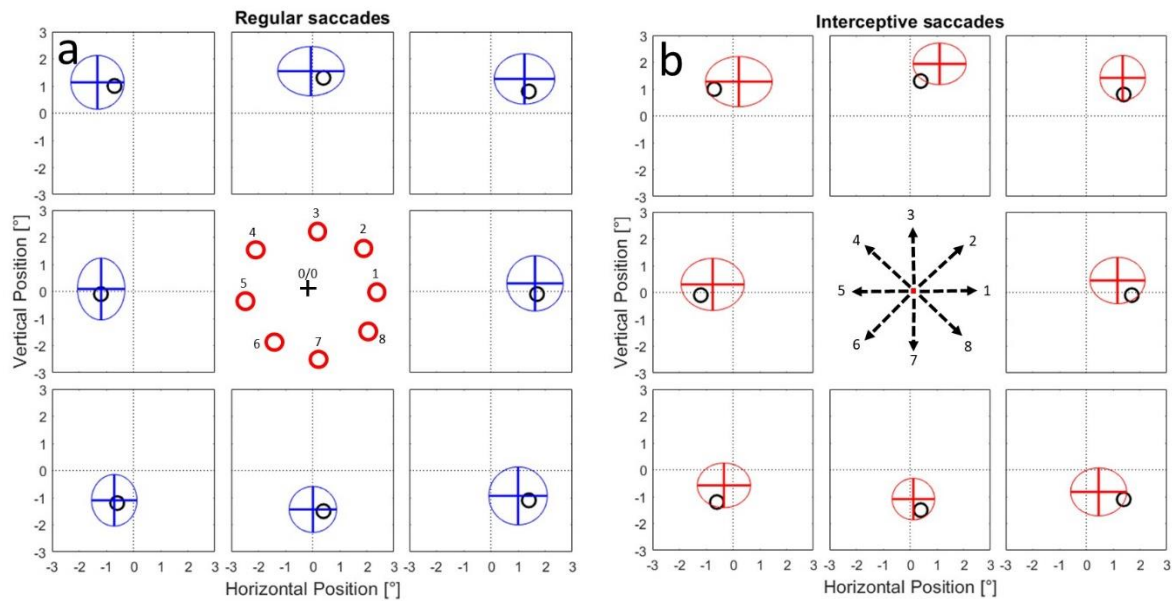

436

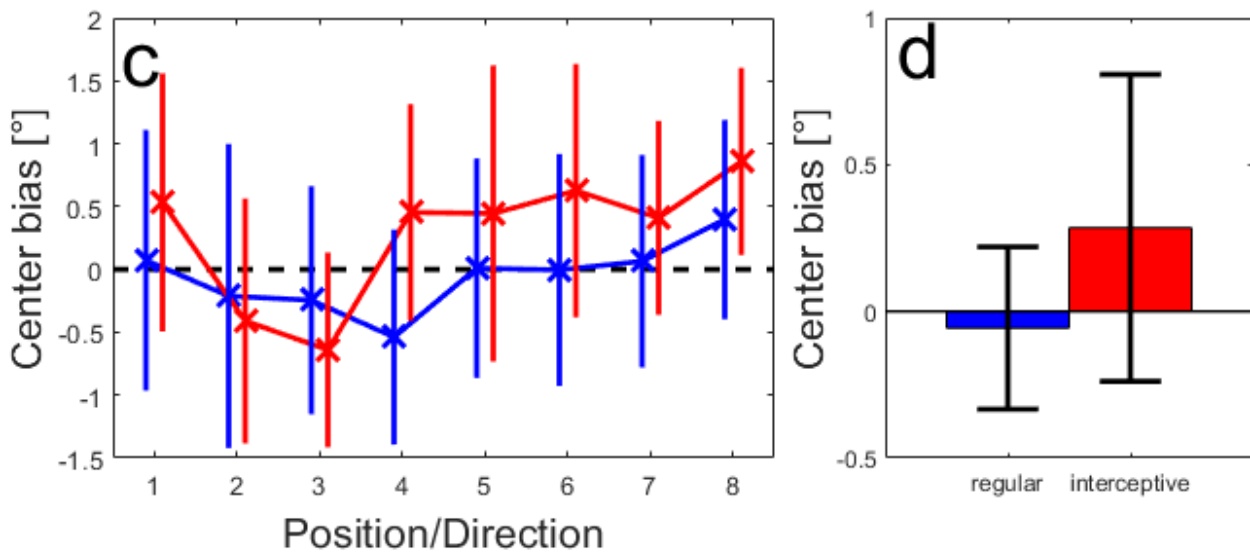

437

438 Figure 10: Same predictions of saccade end positions as in Figure 8. Here the networks were trained based  
 439 on activity of 25 neurons with the strongest similarity between the activity profiles for regular and  
 440 interceptive saccades.

#### 441 Time course of motion information processing

442 Up to this point we investigated the activity collected in a rather broad time-window between 100 ms before  
 443 and 100 ms after the saccade onset. To obtain a temporal profile of the saccade-related information in our  
 444 neuronal sample, we also trained neural networks based on activity in time-windows of 100 ms duration that  
 445 were moved in steps of 50 ms starting from 400 ms before and ending at 350 ms after the saccade onset. As  
 446 described in the Methods, the data in each time-window was again split fifty times into training and validation  
 447 datasets and the networks were trained on the training datasets of each of these splits separately. We used  
 448 the same example saccade end-positions as in previous sections to evaluate the predictions of the model for  
 449 regular and interceptive saccades. The supplemental videos S-5 and S-6 show the development of the means

450 and the standard deviations of the predictions over time in the same format as in Figure 8. The line  
451 intersections represent the average predicted saccade end-position for regular (video S-5) and interceptive  
452 (video S-6) saccades. The ellipses indicate the average standard deviations of the predictions in horizontal  
453 and vertical directions. Two effects can be observed: 1) In a narrow time-window around the onset of the  
454 saccade, the average predicted positions move from the center in the direction of the tested positions. 2)  
455 The variability of the predictions (indicated by the radii of the ellipses) decreases in approximately the same  
456 time-window. The two effects are summarized in Figure 11a, b for regular (blue) and interceptive (red)  
457 saccades. For regular saccades it shows a decrease of the center bias starting at -100 ms and reaching a  
458 minimum at saccade onset. For interceptive saccades the temporal profile appears shifted by ~50 ms, the  
459 center bias starts decreasing 50 ms before and reaches a minimum 50 ms after the saccade onset.  
460 Consequently the largest differences between the predictions for regular and interceptive saccades were  
461 observed before and at saccade onset. The time windows in which the center bias for the two saccade types  
462 was significantly different (paired t-test,  $p < 0.01$ ) are marked by asterisks. After the saccade, center bias  
463 increases again for both types of saccades as the predictions move back towards the center. No significant  
464 differences were observed in the post-saccadic time period. When investigating the trial-by-trial variability  
465 of the predictions (Figure 7b), an increase of precision (as marked by a decrease in the variability of the  
466 predictions) can be observed around saccade onset. No significant differences between the saccade types  
467 were found except for a brief period 200 ms after saccade onset to which we do not assign any specific  
468 meaning. Next, we used the same procedure on the subpopulation of 25 neurons that have shown the  
469 highest similarity of tuning profiles between regular and interceptive saccades as described above. The  
470 results are shown in supplemental videos S-7 and S-8 and summarized in Figure 11c, d. For the center bias  
471 (Figure 11c) similar differences between the temporal profiles for the two saccade types are shown as in the  
472 whole sample of neurons (Figure 11a). Also here, the pre-saccadic coding of the saccade end position for  
473 interceptive saccades is delayed by ~50 ms relative to regular saccades but now having the smallest bias at  
474 the same time, i.e. saccade onset. While there was a substantial center bias, for the predictions of  
475 interceptive saccades based on the whole neuronal sample, this bias was close to zero at the saccade onset  
476 when the model was only based on the selected sample of 25 neurons. The temporal profile of the variability  
477 of the predictions (Figure 11d) was less pronounced and has shown a larger post-saccadic variability for the  
478 predictions of interceptive saccades. This might be caused by the behavioral variability induced by the  
479 smooth pursuit eye movements (including catch-up saccades) that followed the interceptive saccade in  
480 contrast to a steady fixation that was following the regular saccades.

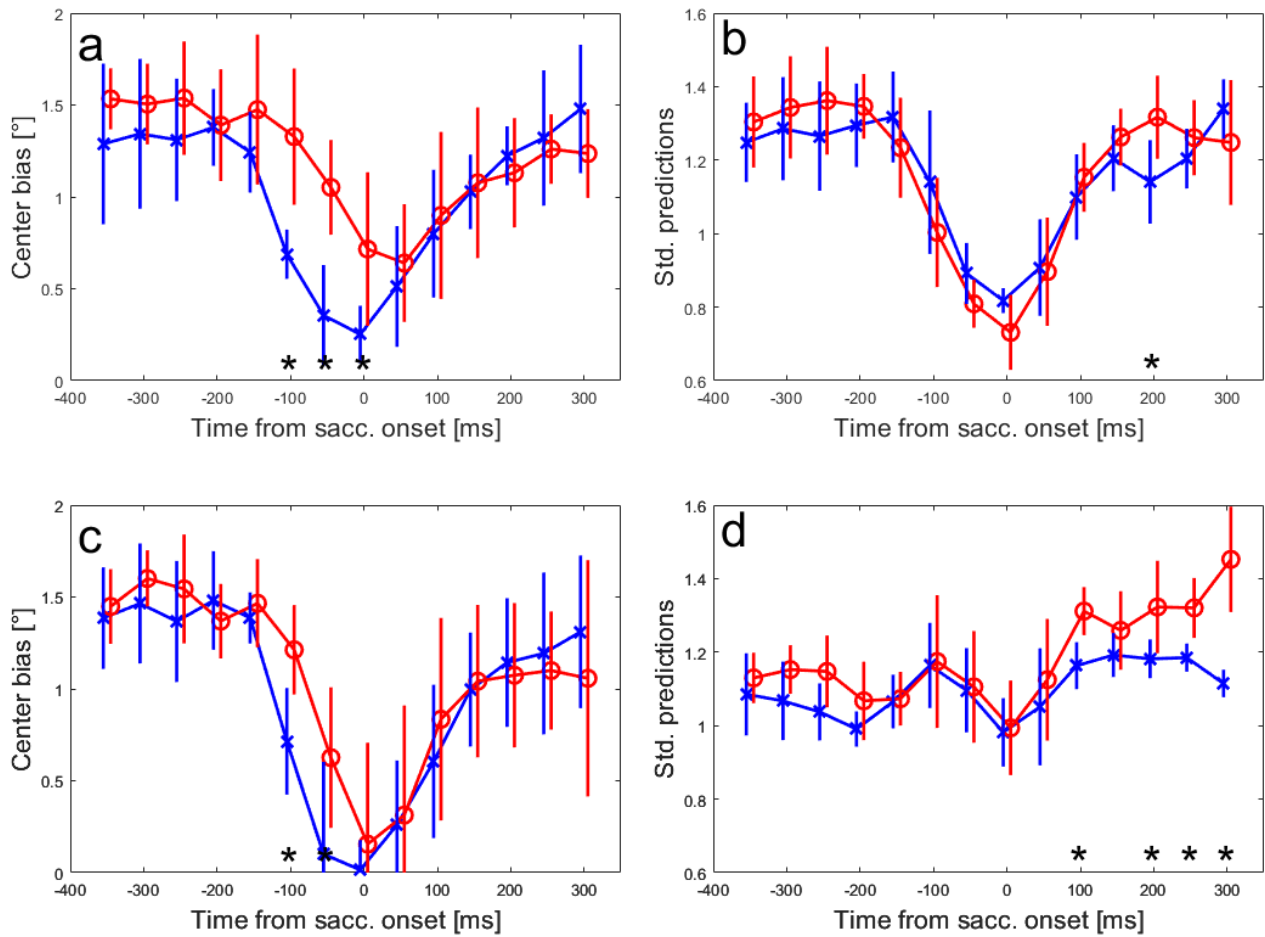

481

482

483 Figure 11a: Average center bias of predicted end-points for regular (blue) and interceptive (red) saccades in  
484 different time-windows relative to saccade onset. The x-axis shows the center of a 100 ms time-window  
485 from which the results were calculated, the error bars show standard deviations over the eight tested  
486 positions. b: Average standard deviations of the predicted saccade end positions for regular (blue) and  
487 interceptive (red) saccades. c, d: Show the same measures as a, b, only based on the predictions derived from  
488 a sub-sample of 25 neurons that have shown the strongest similarity between the activity profiles of regular  
489 and interceptive saccades. The asterisks at the bottom of each plot indicate time windows with significant  
490 (paired t-test,  $p < 0.01$ ) differences between the two saccade types.

## 491 Discussion

### 492 Role of area LIP in generation of interceptive saccades

493 Our results together with our earlier study (Bremmer et al., 2016) clearly point towards an involvement of  
494 LIP neurons in the representation of interceptive saccades. Our results are clearly inconsistent with the  
495 notion that LIP neurons only code for a ‘snapshot’ of the target position taken just after the initial target step  
496 since the motion direction of the target after this step can be successfully recovered from the neuronal  
497 activity. Given this principal finding it should be, however, more precisely specified to what degree LIP  
498 neurons contribute to the very accurate interception of the target position at the end of the saccade. It is,  
499 e.g., possible, that although the neurons do not represent a snapshot of the target position taken  
500 immediately after the target step, they still may use a snapshot taken at some later point in time, when the  
501 target already moved for a distance in the given direction, and thus partly represent the motion of the target  
502 without explicitly processing the motion signal. We believe that this interpretation of our results is unlikely.  
503 In our sample of neurons we found a continuum regarding the representation of the stimulus motion by  
504 single neurons. When we predicted the saccade landing position of interceptive saccades based on all  
505 investigated neurons, the predicted landing position lagged on average by  $0.8^\circ$  which corresponds to 80 ms  
506 of target motion, which is consistent with a position snapshot taken  $\sim 50$  ms before the saccade onset.  
507 However, when only those  $\sim 25\%$  of neurons with the strongest similarity between the tuning profiles for  
508 regular and interceptive saccades, the time was reduced to  $\sim 30$  ms which is approximately the time of  
509 saccade onset. It is not clear whether, given an even more extensive sampling of LIP neurons, another sub-  
510 population would have emerged, that would accurately represent the target position at the time of saccade  
511 end – and thus the actual landing position of an interceptive saccade. The current sample allows for coding  
512 of saccades that represent the target position up to the saccade onset, which gives some credibility to the  
513 idea that (given the processing latencies from LIP to the motor neurons) the neurons did not operate based  
514 just on a snapshot but on a genuine processing of a motion signal (Assad and Maunsell, 1995).

515 Our findings resemble an earlier report from the intermediate and deep layers of the SC (Goffart et al., 2017)  
516 that has also shown a continuum in degrees to which neurons changed the position of their motion fields  
517 during interceptive saccades. The SC is by far the most investigated area regarding its contributions to the  
518 generation of interceptive saccades. An early report (Keller et al., 1996) has shown that the preferred motion  
519 vector of saccade-related SC neurons moved in the direction of target motion during interceptive saccades  
520 relative to saccades to stationary targets. This finding can be interpreted as a lack of contribution of SC-  
521 neurons to the accurate metrics of interceptive saccades and thus a second drive was postulated that  
522 contributes the target-motion related component of the saccade.



523 Areas LIP and SC are strongly interconnected (Andersen et al., 1985) so that it is possible that the properties  
524 reported by Goffart et al. are inherited from area LIP. Both reports suggest that a second drive that further  
525 increases the accuracy of interceptive saccades is likely. It is not clear so far, whether this second drive comes  
526 from the activity of the Fastigial nucleus of the cerebellum as it was hypothesized earlier (Optican and Quail,  
527 2002; Optican and Pretegianni, 2017) or whether it is contributed by the FEF, where motion information was  
528 reported (Barborica and Ferrera, 2003). These possibilities are of course not exclusive.

## 529 Different approaches for decoding of saccades from neuronal activity

530 In this manuscript we present a population-centered approach to the coding of interceptive saccades. This is  
531 slightly different from previous works (e.g. Keller et al. 1996, Goffart et al. 2017) that focused on the accurate  
532 description of single neurons their discharging properties and motion fields.

533 We acknowledge, that other models can be used to decode saccade trajectories from the activity of a  
534 neuronal sample. In previous publications (Bremmer et al. 2016; Churan et al. 2019) we used a maximum  
535 likelihood approach for the same purpose. In that approach we generated probability maps of different  
536 saccade end-positions based on the activity of each neuron and generated a population prediction by  
537 combining all probability maps for the specific activity patterns that were found around the time of the  
538 interceptive saccades. In particular, in Churan et al. (2019) this approach was used on partly the same data  
539 as in this manuscript. Despite the large methodological differences, the basic conclusions derived from these  
540 two approaches were very similar. Our current approach, however, allowed more clear cut results that  
541 appeared more stable (e.g. across different neuronal samples) and independent of outliers than they were  
542 when the maximum likelihood approach was used.

## 543 Future directions

544 As mentioned above, our findings point in the same direction as previous results from the superior colliculus  
545 (Goffart et al., 2017). The methods chosen in that study were different from ours and thus it would be  
546 intriguing to use our decoding approach on a sample of SC-neurons to investigate whether the coding  
547 accuracy for regular and interceptive saccades is similar in SC.

548 A recent development has shown a promising way to further disentangle the contributions of target position  
549 and target motion for generation of interceptive saccades. Goettker et al. (2019) have demonstrated that  
550 when human subjects were asked to perform interceptive saccades towards isoluminant targets, the  
551 interceptive saccades become inaccurate and lag behind the moving target by ~100 ms. This is attributed to  
552 a lack of motion information provided by isoluminant stimuli (Cavanagh et al., 1984; Lu et al., 1999) to areas  
553 of the dorsal processing stream like the middle temporal, and middle superior temporal areas (Thiele et al.,  
554 2001; Rieicansky et al., 2005). Thus it would be intriguing to investigate how the processing of interceptive  
555 saccades in LIP and SC changes between luminance defined and isoluminant stimuli.

556 Acknowledgements

557 This work was supported by Deutsche Forschungsgemeinschaft (CRC/TRR-135/A1 [project number  
558 222641018], IRTG-1901, and RU 1847/A2) and by the Hessisches Ministerium für Wissenschaft und Kunst  
559 (HMWK; project 'The Adaptive Mind').

## 560 References

- 561 Andersen, R. A., Asanuma, C., & Cowan, W. M. (1985). Callosal and prefrontal associational  
562 projecting cell populations in area 7A of the macaque monkey: A study using retrogradely  
563 transported fluorescent dyes. *Journal of Comparative Neurology*, 232(4), 443–455.  
564 <https://doi.org/10.1002/cne.902320403>
- 565 Assad, J. A., & Maunsell, J. H. R. (1995). Neuronal correlates of inferred motion in primate  
566 posterior parietal cortex. *Nature*, 373(6514), 518–521. <https://doi.org/10.1038/373518a0>
- 567 Barash, S., Bracewell, R. M., Fogassi, L., Gnadt, J. W., & Andersen, R. A. (1991). Saccade-related  
568 activity in the lateral intraparietal area. I. Temporal properties; comparison with area 7a.  
569 *Journal of Neurophysiology*, 66(3), 1095–1108.  
570 <http://www.ncbi.nlm.nih.gov/pubmed/1753276>
- 571 Barborica, A., & Ferrera, V. P. (2003). Estimating invisible target speed from neuronal activity in  
572 monkey Frontal eye field. *Nature Neuroscience*, 6(1), 66–74. <https://doi.org/10.1038/nn990>
- 573 Blatt, G. J., Andersen, R. A., & Stoner, G. R. (1990). Visual receptive field organization and  
574 cortico-cortical connections of the lateral intraparietal area (area LIP) in the macaque. *Journal*  
575 *of Comparative Neurology*, 299(4), 421–445. <https://doi.org/10.1002/cne.902990404>
- 576 Brainard, D. H. (1997). The Psychophysics Toolbox. *Spatial Vision*, 10(4), 433–436.  
577 <http://color.psych.ucsb.edu/psychtoolbox>
- 578 Bremmer, F., Kaminiarz, A., Klingenhoefer, S., & Churan, J. (2016). Decoding target distance and  
579 saccade amplitude from population activity in the macaque lateral intraparietal area (LIP).  
580 *Frontiers in Integrative Neuroscience*, 10(AUGUST2016).  
581 <https://doi.org/10.3389/fnint.2016.00030>
- 582 Cassanello, C. R., Nihalani, A. T., & Ferrera, V. P. (2008). Neuronal responses to moving targets in  
583 monkey frontal eye fields. *Journal of Neurophysiology*, 100(3), 1544–1556.  
584 <https://doi.org/10.1152/jn.01401.2007>
- 585 Cavanagh, P., Tyler, C. W., & Favreau, O. E. (1984). Perceived velocity of moving chromatic  
586 gratings. *Journal of the Optical Society of America A*, 1(8), 893.  
587 <https://doi.org/10.1364/josaa.1.000893>
- 588 Churan, J., Braun, D.I., Gegenfurtner K.R., Kaminiarz, A., Bremmer F. Encoding of interceptive  
589 saccades in parietal cortex of macaque monkeys. Program No. 144.07. 2019 Neuroscience  
590 Meeting Planner. Chicago, IL: Society for Neuroscience, 2019. Online.
- 591 Ferrera, V. P., & Barborica, A. (2010). Internally generated error signals in monkey frontal eye field  
592 during an inferred motion task. *Journal of Neuroscience*, 30(35), 11612–11623.  
593 <https://doi.org/10.1523/JNEUROSCI.2977-10.2010>
- 594 Fleuriot, J., & Goffart, L. (2012). Saccadic interception of a moving visual target after a  
595 spatiotemporal perturbation. *Journal of Neuroscience*, 32(2), 452–461.  
596 <https://doi.org/10.1523/JNEUROSCI.3896-11.2012>

- 597 Fuchs, A. F. (1967). Saccadic and smooth pursuit eye movements in the monkey. *The Journal of*  
598 *Physiology*, 191(3), 609–631. <https://doi.org/10.1113/jphysiol.1967.sp008271>
- 599 Ghazanfar, A. A., Stambaugh, C. R., & Nicolelis, M. A. L. (2000). Encoding of tactile stimulus  
600 location by somatosensory thalamocortical ensembles. *Journal of Neuroscience*, 20(10), 3761–  
601 3775. <https://doi.org/10.1523/jneurosci.20-10-03761.2000>
- 602 Glaser, J. I., Benjamin, A. S., Farhoodi, R., & Kording, K. P. (2019). The roles of supervised  
603 machine learning in systems neuroscience. In *Progress in Neurobiology* (Vol. 175, pp. 126–  
604 137). Elsevier Ltd. <https://doi.org/10.1016/j.pneurobio.2019.01.008>
- 605 Goettker, A., Braun, D. I., & Gegenfurtner, K. R. (2019). Dynamic combination of position and  
606 motion information when tracking moving targets. *Journal of Vision*, 19(7).  
607 <https://doi.org/10.1167/19.7.2>
- 608 Goffart, L., Cecala, A. L., & Gandhi, N. J. (2017). The superior colliculus and the steering of  
609 saccades toward a moving visual target. *Journal of Neurophysiology*, 118(5), 2890–2901.  
610 <https://doi.org/10.1152/jn.00506.2017>
- 611 Guan, Y., Eggert, T., Bayer, O., & Büttner, U. (2005). Saccades to stationary and moving targets  
612 differ in the monkey. *Experimental Brain Research*, 161(2), 220–232.  
613 <https://doi.org/10.1007/s00221-004-2070-3>
- 614 Keller, E. L., Gandhi, N. J., & Weir, P. T. (1996). Discharge of superior collicular neurons during  
615 saccades made to moving targets. *Journal of Neurophysiology*, 76(5), 3573–3577.  
616 <https://doi.org/10.1152/jn.1996.76.5.3573>
- 617 Kleiner, M., Brainard, D., Pelli, D., Ingling, A., Murray, R., & Broussard, C. (2007). What's new in  
618 psychtoolbox-3. *Perception*, 36(14), 1–16.
- 619 Lappe, M., & Rauschecker, J. P. (1993). A Neural Network for the Processing of Optic Flow from  
620 Ego-Motion in Man and Higher Mammals. *Neural Computation*, 5(3), 374–391.  
621 <https://doi.org/10.1162/neco.1993.5.3.374>
- 622 Levenberg, K. (1944). A method for the solution of certain non-linear problems in least squares.  
623 *Quarterly of Applied Mathematics*, 2(2), 164–168. <https://doi.org/10.1090/qam/10666>
- 624 Lu, Z. L., Lesmes, L. A., & Sperling, G. (1999). Perceptual motion standstill in rapidly moving  
625 chromatic displays. *Proceedings of the National Academy of Sciences of the United States of*  
626 *America*, 96(26), 15374–15379. <https://doi.org/10.1073/pnas.96.26.15374>
- 627 Marquardt, D. W. (1963). An Algorithm for Least-Squares Estimation of Nonlinear Parameters.  
628 *Journal of the Society for Industrial and Applied Mathematics*, 11(2), 431–441.  
629 <https://doi.org/10.1137/0111030>
- 630 Newsome, W. T., Wurtz, R. H., Dursteler, M. R., & Mikami, A. (1985). Deficits in visual motion  
631 processing following ibotenic acid lesions of the middle temporal visual area of the macaque  
632 monkey. *Journal of Neuroscience*, 5(3), 825–840. <https://doi.org/10.1523/jneurosci.05-03-00825.1985>
- 634 Optican, L. M., & Pretegeiani, E. (2017). What stops a saccade? *Philosophical Transactions of the*  
635 *Royal Society B: Biological Sciences*, 372(1718). <https://doi.org/10.1098/rstb.2016.0194>

- 636 Optican, L. M., & Quaia, C. (2002). Distributed Model of Collicular and Cerebellar Function during  
637 Saccades. *Annals of the New York Academy of Sciences*, 956(1), 164–177.  
638 <https://doi.org/10.1111/j.1749-6632.2002.tb02817.x>
- 639 Paré, M., & Wurtz, R. H. (1997). Monkey posterior parietal cortex neurons antidromically activated  
640 from superior colliculus. *Journal of Neurophysiology*, 78(6), 3493–3497.  
641 <https://doi.org/10.1152/jn.1997.78.6.3493>
- 642 Pelli, D. G. (1997). The VideoToolbox software for visual psychophysics: transforming numbers  
643 into movies. *Spatial Vision*, 10(4), 437–442. <http://www.ncbi.nlm.nih.gov/pubmed/9176953>
- 644 Plexon (2020). Offline Sorter: User Guide. Retrieved from: [https://plexon.com/wp-](https://plexon.com/wp-content/uploads/2020/01/Offline-Sorter-v4-User-Guide.pdf)  
645 [content/uploads/2020/01/Offline-Sorter-v4-User-Guide.pdf](https://plexon.com/wp-content/uploads/2020/01/Offline-Sorter-v4-User-Guide.pdf)
- 646 Quinet, J., & Goffart, L. (2015). Does the brain extrapolate the position of a transient moving  
647 target? *Journal of Neuroscience*, 35(34), 11780–11790.  
648 <https://doi.org/10.1523/JNEUROSCI.1212-15.2015>
- 649 Riečanský, I., Thiele, A., Distler, C., & Hoffmann, K. P. (2005). Chromatic sensitivity of neurones  
650 in area MT of the anaesthetised macaque monkey compared to human motion perception.  
651 *Experimental Brain Research*, 167(4), 504–525. <https://doi.org/10.1007/s00221-005-0058-2>
- 652 Schall, J. D., Morel, A., King, D. J., & Bullier, J. (1995). Topography of visual cortex connections  
653 with frontal eye field in macaque: Convergence and segregation of processing streams. *Journal*  
654 *of Neuroscience*, 15(6), 4464–4487. <https://doi.org/10.1523/jneurosci.15-06-04464.1995>
- 655 Schiller, P. H., True, S. D., & Conway, J. L. (1980). Deficits in eye movements following frontal  
656 eye-field and superior colliculus ablations. *Journal of Neurophysiology*, 44(6), 1175–1189.  
657 <https://doi.org/10.1152/jn.1980.44.6.1175>
- 658 Segraves, M. A., & Goldberg, M. E. (1987). Functional properties of corticotectal neurons in the  
659 monkey's frontal eye field. *Journal of Neurophysiology*, 58(6), 1387–1419.  
660 <https://doi.org/10.1152/jn.1987.58.6.1387>
- 661 Shadlen, M. N., & Newsome, W. T. (1998). The variable discharge of cortical neurons:  
662 Implications for connectivity, computation, and information coding. *Journal of Neuroscience*,  
663 18(10), 3870–3896. <https://doi.org/10.1523/jneurosci.18-10-03870.1998>
- 664 Sotero, R. C., Bortel, A., Martínez-Cancino, R., Neupane, S., O'Connor, P., Carbonell, F., &  
665 Shmuel, A. (2010). Anatomically-constrained effective connectivity among layers in a cortical  
666 column modeled and estimated from local field potentials. *Journal of Integrative*  
667 *Neuroscience*, 9(4), 355–379. <https://doi.org/10.1142/S0219635210002548>
- 668 Stanton, G. B., Goldberg, M. E., & Bruce, C. J. (1988). Frontal eye field efferents in the macaque  
669 monkey: II. Topography of terminal fields in midbrain and pons. *Journal of Comparative*  
670 *Neurology*, 271(4), 493–506. <https://doi.org/10.1002/cne.902710403>
- 671 Thiele, A., Dobkins, K. R., & Albright, T. D. (1999). The contribution of color to motion  
672 processing in macaque middle temporal area. *Journal of Neuroscience*, 19(15), 6571–6587.  
673 <https://doi.org/10.1523/jneurosci.19-15-06571.1999>

- 674 Wessberg, J., Stambaugh, C. R., Kralik, J. D., Beck, P. D., Laubach, M., Chapin, J. K., Kim, J.,  
675 Biggs, S. J., Srinivasan, M. A., & Nicolelis, M. A. L. (2000). Real-time prediction of hand  
676 trajectory by ensembles of cortical neurons in primates. *Nature*, *408*(6810), 361–365.  
677 <https://doi.org/10.1038/35042582>
- 678 Xiao, Q., Barborica, A., & Ferrera, V. P. (2007). Modulation of visual responses in macaque frontal  
679 eye field during covert tracking of invisible targets. *Cerebral Cortex*, *17*(4), 918–928.  
680 <https://doi.org/10.1093/cercor/bhl002>

681 Supplement

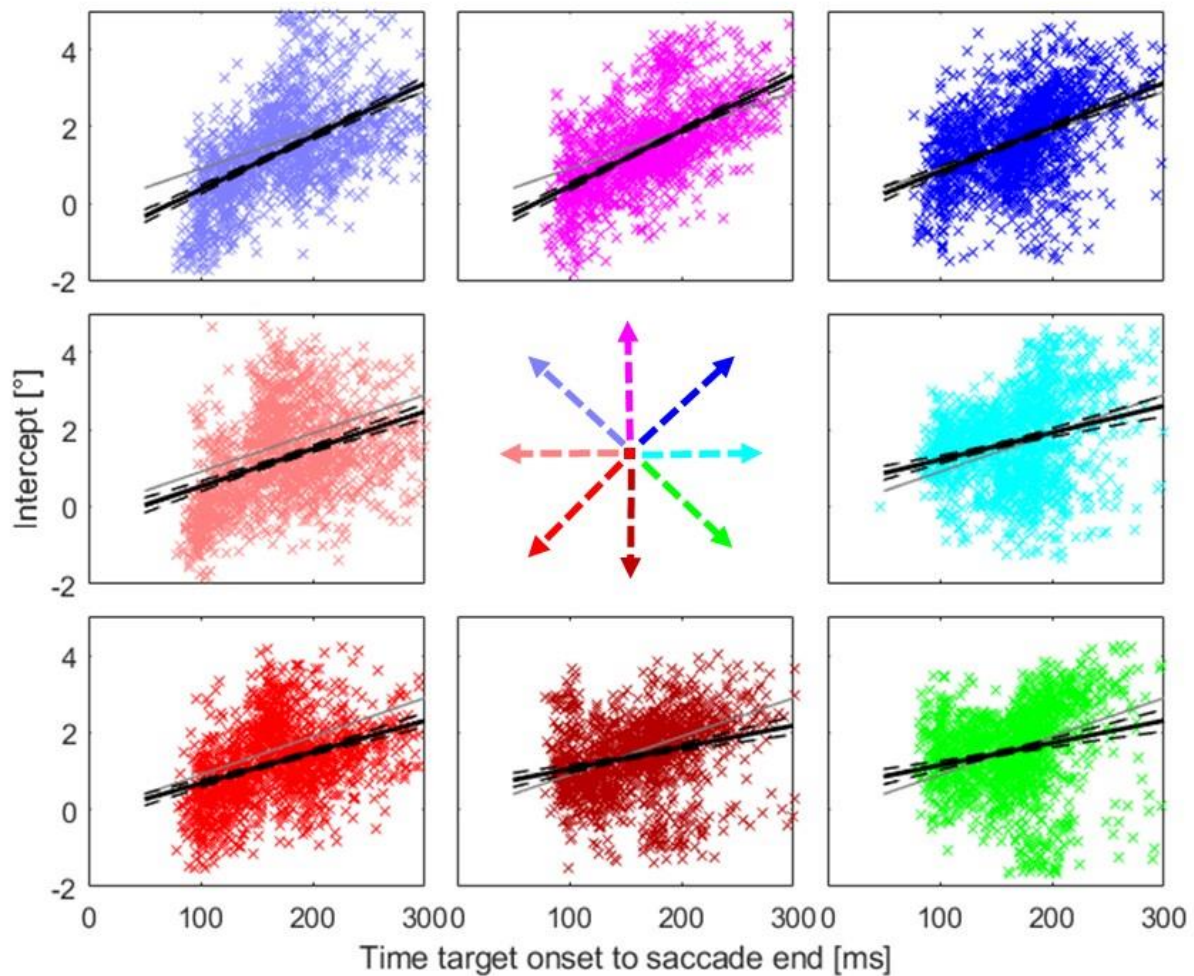

682

683 Figure S-1: Relationship between the timing of the end of the interceptive saccades and their intercepts for  
684 different directions of target motion. Different plots show the data from individual target directions  
685 according to the arrows. Grey lines marks the position of the target (relative to the center of the screen) at  
686 the respective time. Black line shows the results of a linear regression of the data and the black dashed lines  
687 its confidence interval ( $p=0.01$ , as calculated from a bootstrapping procedure).

688

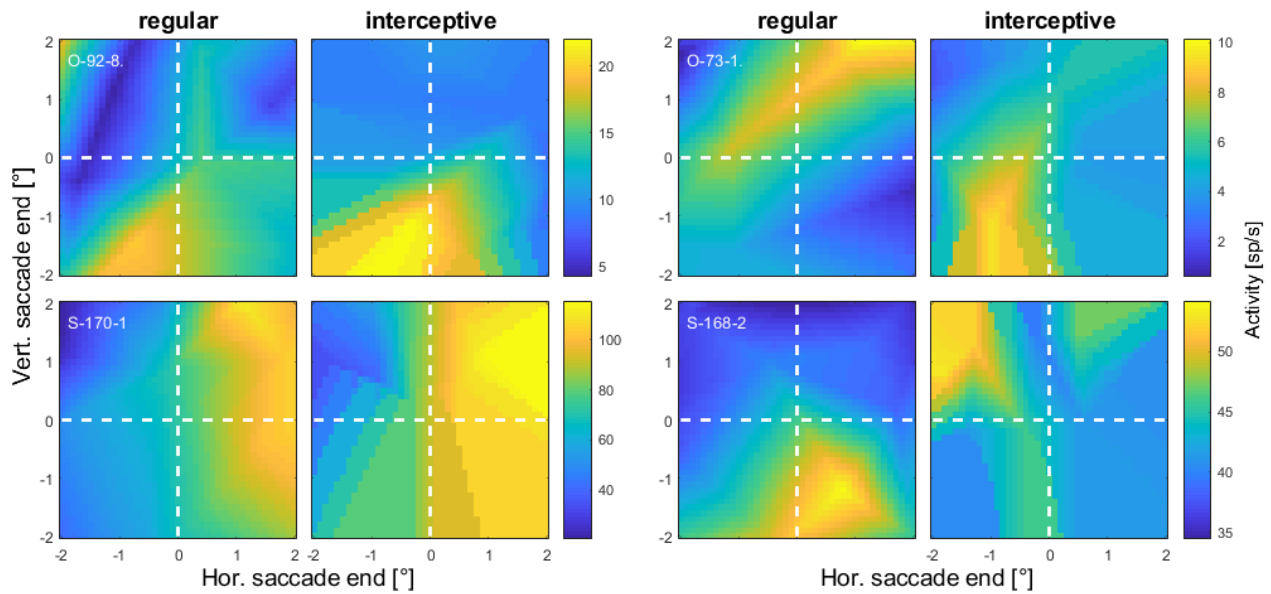

689

690 Figure S-2: Spatial tuning profiles from another four example neurons in the same format as Figure 6. The  
691 positions at the x and y axes represent the locations of saccade endpoints relative to the center of the screen.  
692 The two examples in the left two columns show an apparent similarity between the two activity profiles while  
693 for the neurons in the two columns on the right no such similarity was observed.

694



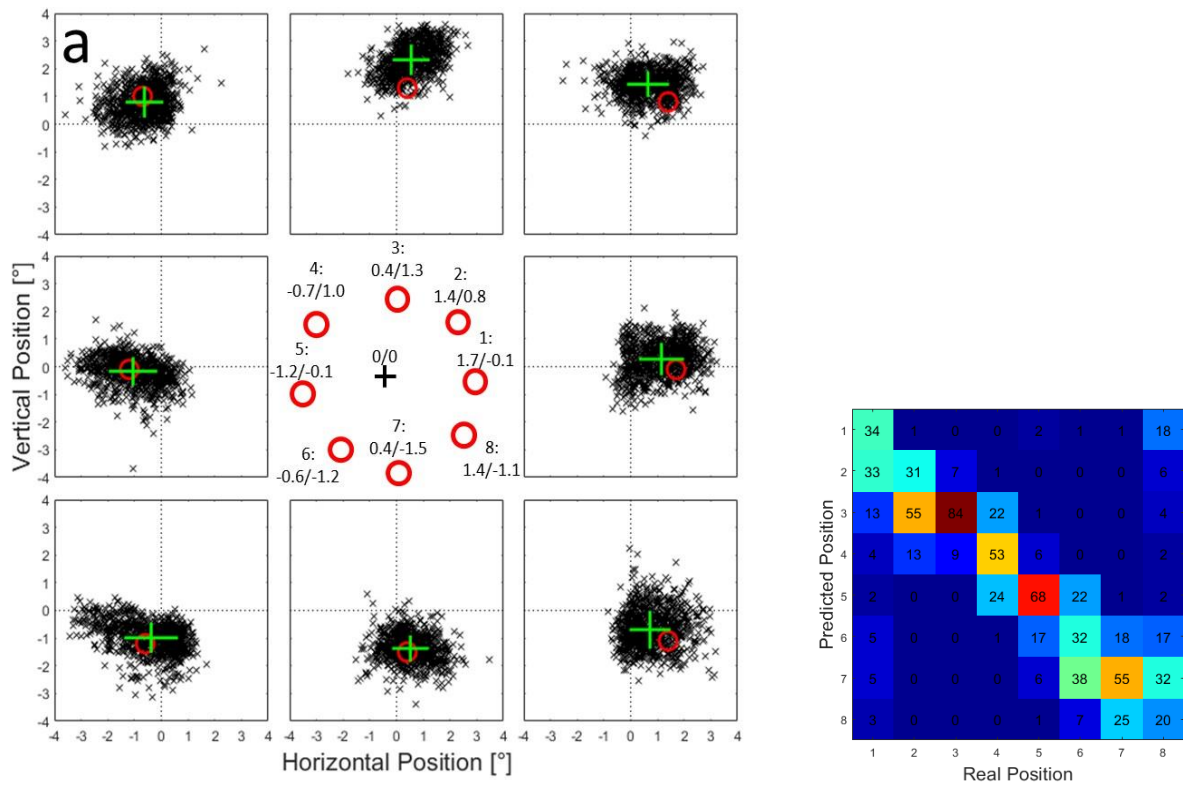

695

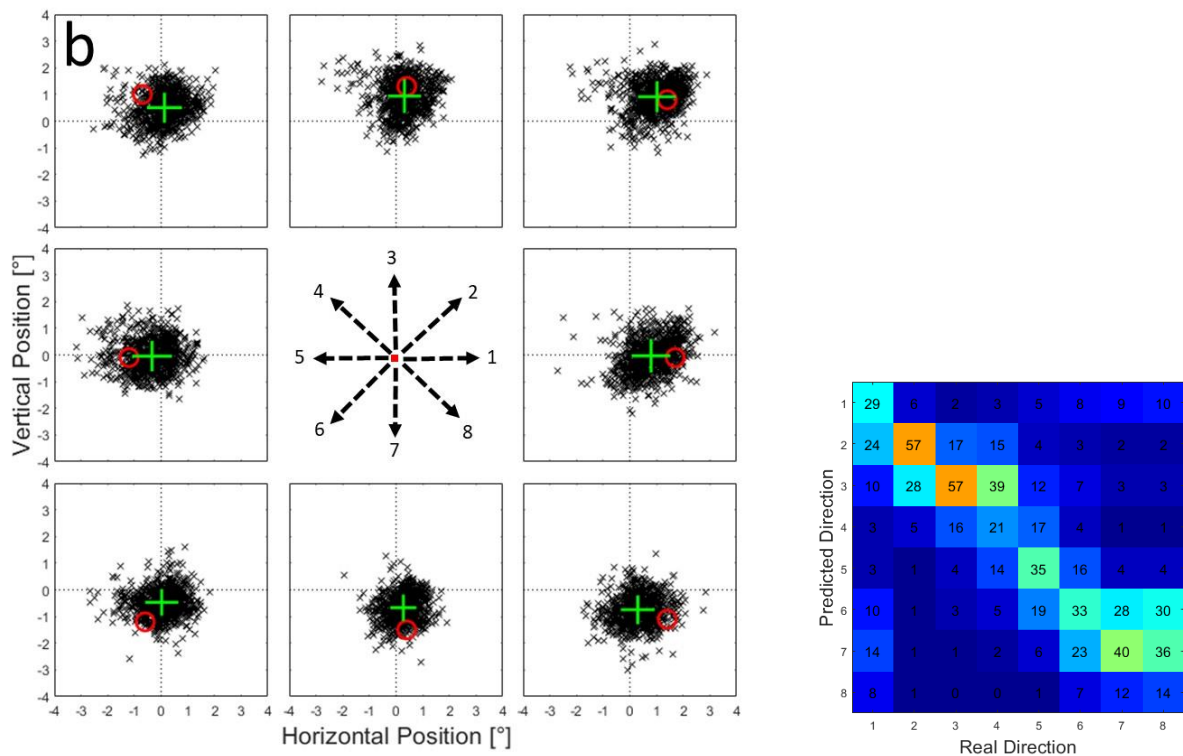

696

697 Figure S-3a: Example of the predictions from one neural network using estimated spike counts in a time  
 698 window between 100 ms before and 100 ms after the onset of regular saccades. Black crosses represent the  
 699 predictions of 1000 trials that were generated from the activity estimates for each tested position. b:  
 700 Predictions of same network as in a) for saccade end-points of interceptive saccades.

701

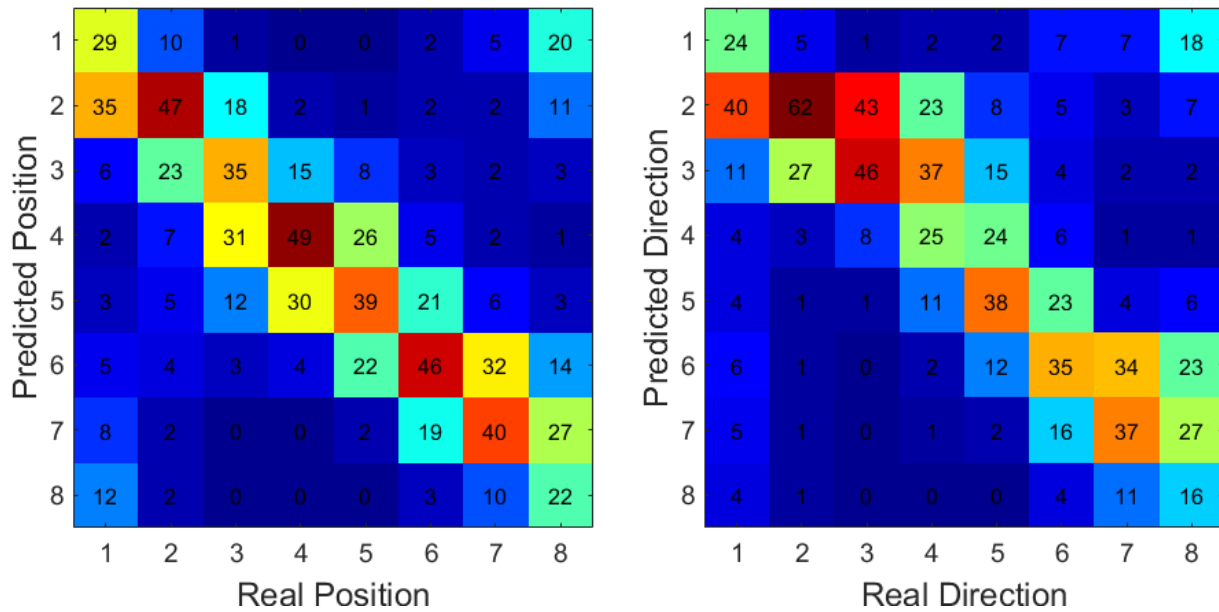

702

703 Figure S-4: Confusion matrices for results shown in Figure 10a, b. The saccade end positions were predicted  
 704 based on the activity of a sample of 25 neurons that have previously shown the strongest similarity between  
 705 the activity profiles for regular and interceptive saccades. They were then assigned to one of the eight tested  
 706 positions based on minimal Euclidian distance. For regular saccades (left) on average 38% of the trials were  
 707 assigned correctly and in 82% correct or to one of the neighbors. For interceptive saccades (right) on average  
 708 35% of the trials were assigned correctly and in 78% correct or to one of the neighbors.
